# Supplementary material for: Modulating the structural topologies from star-shape to cross-shape for Co–Dy heterometallic complexes with slow magnetic relaxation behavior
Source: Royal Society of Chemistry journal article supplement (doi:10.1039/d2ce01381a), 2022-11-28
Supplement: d2ce01381a1.pdf [file d2ce01381a1.pdf]

# Electronic Supplementary Information (ESI)

for *CrystEngComm*

## Modulating the Structural Topologies from Star-shape to Cross-shape for the Co-Dy Heterometallic Complexes with Slow Magnetic Relaxation Behavior

Hui-Sheng Wang,<sup>\*a</sup> Chun-Fang Yu,<sup>a</sup> Si-Qi Ye,<sup>a</sup> Yong Chen,<sup>a</sup> Xueru Liu,<sup>\*b</sup> Yanfang Wu,<sup>\*c</sup> Pengfei Zhou<sup>a</sup> and Yi-Quan Zhang<sup>d</sup>

<sup>a</sup> School of Chemistry and Environmental Engineering, Key Laboratory of Green Chemical Process of Ministry of Education, Key Laboratory of Novel Reactor and Green Chemical Technology of Hubei Province, Wuhan Institute of Technology, Wuhan 430074, P. R. China.

<sup>b</sup> College of Chemistry and Materials Science, Northwest University, Xi'an 710127, P. R. China.

<sup>c</sup> School of Energy and Mechanical Engineering, Jiangxi University of Science and Technology, Nanchang 330013, P. R. China.

<sup>d</sup> School of Physical Science and Technology, Nanjing Normal University, Nanjing 210023, P. R. China.

Corresponding Author

\*Email: wangch198201@163.com (H.S. Wang).

\*Email: lxueru@nwu.edu.cn (Xueru Liu).

\*Email: wuyanfang1208@163.com (Y. Wu).

**Table S1.** Crystallographic Data for compounds **1** and **2**.

| Compounds                                                                      | <b>1</b>                                                                                           | <b>2</b>                                                                            |
|--------------------------------------------------------------------------------|----------------------------------------------------------------------------------------------------|-------------------------------------------------------------------------------------|
| Formula <sup>a</sup>                                                           | C <sub>48</sub> H <sub>55</sub> Co <sub>2</sub> Dy <sub>2</sub> N <sub>12</sub> O <sub>25.50</sub> | C <sub>108</sub> H <sub>141</sub> Co <sub>7</sub> DyN <sub>15</sub> O <sub>43</sub> |
| Formula weight <sup>a</sup>                                                    | 1650.90                                                                                            | 2912.36                                                                             |
| Crystal colour                                                                 | brown                                                                                              | dark brown                                                                          |
| Crystal size/mm                                                                | 0.26 × 0.20 × 0.06                                                                                 | 0.27 × 0.24 × 0.17                                                                  |
| Crystal system                                                                 | triclinic                                                                                          | monoclinic                                                                          |
| Space group                                                                    | <i>P</i> $\bar{1}$                                                                                 | <i>P</i> 2 <sub>1</sub> / <i>n</i>                                                  |
| <i>a</i> (Å)                                                                   | 11.9878(17)                                                                                        | 23.2569(10)                                                                         |
| <i>b</i> (Å)                                                                   | 13.4630(19)                                                                                        | 19.2410(8)                                                                          |
| <i>c</i> (Å)                                                                   | 19.444(3)                                                                                          | 28.2143(14)                                                                         |
| $\alpha$ (°)                                                                   | 103.072(2)                                                                                         | 90                                                                                  |
| $\beta$ (°)                                                                    | 97.912(2)                                                                                          | 101.344(2)                                                                          |
| $\gamma$ (°)                                                                   | 100.201(2)                                                                                         | 90                                                                                  |
| Unit cell volume (Å <sup>3</sup> )                                             | 2956.4(7)                                                                                          | 12378.9(10)                                                                         |
| Temperature (K)                                                                | 296(2)                                                                                             | 173(2)                                                                              |
| <i>Z</i>                                                                       | 2                                                                                                  | 4                                                                                   |
| Wavelength (Å)                                                                 | 0.71073                                                                                            | 0.71073                                                                             |
| $\mu$ (Mo <i>K</i> $\alpha$ ) [mm <sup>-1</sup> ]                              | 3.144                                                                                              | 1.599                                                                               |
| <i>D</i> <sub>c</sub> (g cm <sup>-3</sup> )                                    | 1.855                                                                                              | 1.563                                                                               |
| $\theta$ range (°)                                                             | 2.19- 20.58                                                                                        | 2.9455-25.3954                                                                      |
| Index ranges                                                                   | -14 ≤ <i>h</i> ≤ 13<br>-15 ≤ <i>k</i> ≤ 15<br>-23 ≤ <i>l</i> ≤ 23                                  | -27 ≤ <i>h</i> ≤ 25<br>-22 ≤ <i>k</i> ≤ 21<br>-33 ≤ <i>l</i> ≤ 33                   |
| <i>F</i> (000)                                                                 | 1634                                                                                               | 5972                                                                                |
| Reflections collected                                                          | 27817                                                                                              | 67104                                                                               |
| Unique reflections [ <i>R</i> <sub>int</sub> ]                                 | 10291 [0.0645]                                                                                     | 21537 [0.0613]                                                                      |
| Reflections with <i>I</i> > 2 $\sigma$ ( <i>I</i> )                            | 7258                                                                                               | 15343                                                                               |
| Final <i>R</i> indices ( <i>I</i> > 2 $\sigma$ ( <i>I</i> ))<br><sub>b,c</sub> | <i>R</i> <sub>1</sub> = 0.0457, <i>wR</i> <sub>2</sub> = 0.0842                                    | <i>R</i> <sub>1</sub> = 0.0648, <i>wR</i> <sub>2</sub> = 0.1294                     |
| Final <i>R</i> indices (all data)                                              | <i>R</i> <sub>1</sub> = 0.0736, <i>wR</i> <sub>2</sub> = 0.0895                                    | <i>R</i> <sub>1</sub> = 0.1038, <i>wR</i> <sub>2</sub> = 0.1420                     |
| <i>S</i> (all data)                                                            | 1.192                                                                                              | 1.084                                                                               |
| ( $\Delta\rho$ ) <sub>max,min</sub> /e Å <sup>-3</sup>                         | 1.487 and -1.086                                                                                   | 1.957 and -1.325                                                                    |

<sup>a</sup> The formula and the formula weights include the H<sub>2</sub>O and MeCN solvent molecules which were free.

<sup>b</sup>  $R_1 = \Sigma(|F_o| - |F_c|)/\Sigma|F_o|$ . <sup>c</sup>  $wR_2 = [\Sigma[w(F_o^2 - F_c^2)^2]/\Sigma[w(F_o^2)^2]]^{1/2}$ ,  $w = 1/[\sigma^2(F_o^2) + [(ap)^2 + bp]$ , where  $p = [\max(F_o^2, 0) + 2F_c^2]/3$ .

**Table S2.** Selected bond lengths (Å) and angles (°) for **1**.

| Selected bond lengths for <b>1</b> |          |         |          |         |          |
|------------------------------------|----------|---------|----------|---------|----------|
| Co1-O1                             | 1.884(4) | Co2-O9  | 1.922(4) | Dy2-O10 | 2.247(4) |
| Co1-O3                             | 1.892(4) | Co2-O7  | 1.963(4) | Dy2-O2  | 2.270(4) |
| Co1-N2                             | 1.921(6) | Dy1-O9  | 2.287(4) | Dy2-O23 | 2.371(4) |
| Co1-N1                             | 1.936(5) | Dy1-O10 | 2.296(4) | Dy2-O21 | 2.439(5) |
| Co1-N3                             | 1.930(5) | Dy1-O1  | 2.324(4) | Dy2-O17 | 2.455(6) |
| Co1-N4                             | 1.948(6) | Dy1-O7  | 2.367(4) | Dy2-O18 | 2.456(6) |
| Co2-O5                             | 1.878(4) | Dy1-O6  | 2.425(4) | Dy2-O15 | 2.491(6) |
| Co2-N5                             | 1.886(6) | Dy1-O2  | 2.434(4) | Dy2-O20 | 2.512(5) |
| Co2-O8                             | 1.885(5) | Dy1-O11 | 2.454(5) | Dy2-O14 | 2.537(5) |
| Co2-N6                             | 1.904(6) | Dy1-O12 | 2.430(5) |         |          |

  

| Selected bond angles for <b>1</b> |            |             |            |             |            |
|-----------------------------------|------------|-------------|------------|-------------|------------|
| O1-Co1-O3                         | 93.71(18)  | O10-Dy1-O1  | 122.56(14) | O2-Dy2-O15  | 149.6(2)   |
| O1-Co1-N2                         | 83.5(2)    | O9-Dy1-O7   | 70.18(15)  | O23-Dy2-O15 | 96.6(2)    |
| O3-Co1-N2                         | 91.2(2)    | O10-Dy1-O7  | 79.85(15)  | O21-Dy2-O15 | 70.0(2)    |
| O1-Co1-N3                         | 175.7(2)   | O1-Dy1-O7   | 119.27(15) | O17-Dy2-O15 | 67.8(2)    |
| O3-Co1-N3                         | 83.5(2)    | O9-Dy1-O6   | 89.92(15)  | O18-Dy2-O15 | 67.5(2)    |
| N2-Co1-N3                         | 93.3(2)    | O10-Dy1-O6  | 155.27(16) | O10-Dy2-O20 | 80.15(16)  |
| O1-Co1-N1                         | 81.3(2)    | O1-Dy1-O6   | 70.63(14)  | O2-Dy2-O20  | 79.75(16)  |
| O3-Co1-N1                         | 175.0(2)   | O7-Dy1-O6   | 75.43(15)  | O23-Dy2-O20 | 155.48(16) |
| O5-Co2-O9                         | 91.28(19)  | O9-Dy1-O12  | 88.38(16)  | O21-Dy2-O20 | 51.65(17)  |
| N5-Co2-O9                         | 93.0(2)    | O10-Dy1-O12 | 77.76(17)  | O17-Dy2-O20 | 120.3(2)   |
| O8-Co2-O9                         | 178.18(19) | O1-Dy1-O12  | 88.79(16)  | O18-Dy2-O20 | 71.3(2)    |
| N6-Co2-O9                         | 84.2(2)    | O7-Dy1-O12  | 150.77(16) | O15-Dy2-O20 | 107.4(2)   |
| O5-Co2-O7                         | 177.75(19) | O6-Dy1-O12  | 125.70(17) | O10-Dy2-O14 | 87.9(2)    |
| N5-Co2-O7                         | 83.4(2)    | O9-Dy1-O2   | 149.27(15) | O2-Dy2-O14  | 150.21(18) |
| O8-Co2-O7                         | 91.23(19)  | O10-Dy1-O2  | 68.71(15)  | O23-Dy2-O14 | 71.69(17)  |
| N6-Co2-O7                         | 95.5(2)    | O1-Dy1-O2   | 57.21(14)  | O21-Dy2-O14 | 68.57(19)  |
| O9-Co2-O7                         | 87.08(18)  | O7-Dy1-O2   | 93.76(14)  | O17-Dy2-O14 | 102.8(2)   |
| O9-Dy1-O10                        | 82.43(15)  | O6-Dy1-O2   | 111.84(15) | O18-Dy2-O14 | 118.5(2)   |
| O9-Dy1-O1                         | 153.52(15) | O10-Dy2-O15 | 137.3(2)   | O20-Dy2-O14 | 119.63(19) |

**Table S3.** Selected bond lengths (Å) and angles (°) in **2**.

| Selected bond lengths in <b>2</b> |            |             |            |                      |            |
|-----------------------------------|------------|-------------|------------|----------------------|------------|
| Co1-O1                            | 1.900(5)   | Co3-O9      | 1.913(5)   | Co6-O23              | 1.903(5)   |
| Co1-O4                            | 1.910(5)   | Co3-O11     | 1.913(5)   | Co6-N8               | 1.910(6)   |
| Co1-N1                            | 1.911(6)   | Co4-O13     | 1.884(5)   | Co6-N7               | 1.912(6)   |
| Co1-O5                            | 1.914(5)   | Co4-N5      | 1.891(6)   | Co6-O19              | 1.930(5)   |
| Co1-N2                            | 1.917(6)   | Co4-N6      | 1.896(6)   | Co7-O25              | 1.895(4)   |
| Co1-O2                            | 1.925(4)   | Co4-O15     | 1.898(4)   | Co7-N9               | 1.915(6)   |
| Co2-O5                            | 2.056(4)   | Co4-O17     | 1.912(5)   | Co7-N10              | 1.917(6)   |
| Co2-O14                           | 2.060(4)   | Co4-O16     | 1.933(5)   | Co7-N10 <sup>i</sup> | 1.918(6)   |
| Co2-O3                            | 2.093(4)   | Co5-O12     | 2.054(5)   | Dy1-O8               | 2.241(4)   |
| Co2-O6                            | 2.106(5)   | Co5-O20     | 2.060(5)   | Dy1-O18              | 2.250(4)   |
| Co2-O8                            | 2.112(4)   | Co5-O24     | 2.101(4)   | Dy1-O14              | 2.252(4)   |
| Co2-O2                            | 2.142(4)   | Co5-O21     | 2.110(5)   | Dy1-O12              | 2.267(4)   |
| Co3-O7                            | 1.890(5)   | Co5-O18     | 2.113(4)   | Dy1-O15              | 2.468(4)   |
| Co3-N3                            | 1.897(6)   | Co5-O23     | 2.129(5)   | Dy1-O11              | 2.498(4)   |
| Co3-O10                           | 1.897(5)   | Co6-O22     | 1.888(5)   | Dy1-O9               | 2.528(5)   |
| Co3-N4                            | 1.912(6)   | Co6-O20     | 1.888(5)   | Dy1-O17              | 2.548(5)   |
| Selected bond angles in <b>2</b>  |            |             |            |                      |            |
| O1-Co1-O4                         | 91.6(2)    | N5-Co4-O16  | 87.2(2)    | O25-Co7-N10          | 83.6(2)    |
| O1-Co1-N1                         | 94.9(2)    | N6-Co4-O16  | 94.7(2)    | N9-Co7-N10           | 88.6(3)    |
| O4-Co1-N1                         | 86.5(2)    | O15-Co4-O16 | 89.7(2)    | O25-Co7-N9           | 83.6(2)    |
| O1-Co1-O5                         | 89.6(2)    | O17-Co4-O16 | 175.4(2)   | O8-Dy1-O18           | 111.69(15) |
| O14-Co2-O6                        | 89.28(17)  | O24 Co5 O23 | 89.43(17)  | O8-Dy1-O14           | 76.04(14)  |
| O3-Co2-O6                         | 178.44(18) | O21 Co5 O23 | 90.42(18)  | O18-Dy1-O14          | 150.87(16) |
| O5-Co2-O8                         | 98.03(17)  | O18 Co5 O23 | 175.74(18) | O14-Dy1-O12          | 111.60(15) |
| O14-Co2-O8                        | 83.10(16)  | O12 Co5 Co6 | 139.41(12) | O8-Dy1-O15           | 134.89(15) |
| O10-Co3-O9                        | 91.8(2)    | O22-Co6-O23 | 177.9(2)   | O12-Dy1-O15          | 73.98(15)  |
| N4-Co3-O9                         | 93.4(2)    | O20-Co6-O23 | 88.0(2)    | O8-Dy1-O11           | 78.05(15)  |
| O7-Co3-O11                        | 90.6(2)    | O22-Co6-N8  | 94.5(3)    | O11-Dy1-O9           | 62.45(15)  |
| N3-Co3-O11                        | 94.3(2)    | O20-Co6-N8  | 89.1(2)    | O8-Dy1-O17           | 76.16(15)  |

**Table S4.** Bond valence sum (BVS) calculations for determining of the protonation levels of the O atoms in **1** and **2**.

| Atoms in <b>1</b> | BVS values of <b>1</b> | Atoms in <b>1</b> | BVS values of in <b>1</b> |
|-------------------|------------------------|-------------------|---------------------------|
| O1                | 1.86                   | O2                | 1.85                      |
| O3                | 1.51                   | O4                | 2.21                      |
| O5                | 1.75                   | O6                | 1.24                      |
| O7                | 1.71                   | O8                | 1.76                      |
| O9                | 1.87                   | O10               | 1.92                      |
| O11               | 1.85                   | O12               | 1.82                      |
| O13               | 1.78                   | O14               | 1.98                      |
| O15               | 1.84                   | O16               | 1.50                      |
| O17               | 1.94                   | O18               | 1.84                      |
| O19               | 1.76                   | O20               | 1.78                      |
| O21               | 1.83                   | O22               | 1.71                      |
| O23               | 1.31                   |                   |                           |

  

| Atoms in <b>2</b> | BVS values of <b>2</b> | Atoms in <b>2</b> | BVS values of <b>2</b> |
|-------------------|------------------------|-------------------|------------------------|
| O1                | 1.70                   | O15               | 1.70                   |
| O2                | 1.68                   | O16               | 1.74                   |
| O3                | 1.25                   | O17               | 1.60                   |
| O4                | 1.76                   | O18               | 1.87                   |
| O5                | 1.74                   | O19               | 1.60                   |
| O6                | 1.27                   | O20               | 1.75                   |
| O7                | 1.71                   | O21               | 1.21                   |
| O8                | 1.87                   | O22               | 1.77                   |
| O9                | 1.65                   | O23               | 1.75                   |
| O10               | 1.70                   | O24               | 1.23                   |
| O11               | 1.72                   | O25               | 1.44                   |
| O12               | 1.87                   | O26               | 1.02                   |
| O13               | 1.73                   | O27               | 1.45                   |
| O14               | 1.90                   | O28               | 1.09                   |

The values of BVS calculations for O atoms in the  $\sim 1.8$ – $2.0$ ,  $\sim 1.0$ – $1.2$ , and  $\sim 0.2$ – $0.4$  ranges are indicative of non-, single- and double-protonation, respectively. The O atoms with one H atoms were labeled by red.

**Table S5.** Bond valence sum (BVS) calculations for determining of the oxidation of the Co atoms in **1** and **2**.

| Co atoms in complex <b>1</b> | Co (II)      | Co (III)     |
|------------------------------|--------------|--------------|
| Co (1)                       | 3.05         | <u>3.46</u>  |
| Co (2)                       | 3.19         | <u>3.21</u>  |
| Co atoms in complex <b>2</b> | Co (II)      | Co (III)     |
| Co (1)                       | 3.186        | <u>3.185</u> |
| Co (2)                       | <u>2.026</u> | 1.747        |
| Co (3)                       | 3.266        | <u>3.266</u> |
| Co (4)                       | 3.277        | <u>3.289</u> |
| Co (5)                       | <u>2.027</u> | 1.747        |
| Co (6)                       | 3.256        | <u>3.250</u> |

**Table S6.** The possible geometries of oct-coordination metal centers and Deviation parameters from each ideal polyhedron for Dy1 in **1**.

| Point group | Geometry | Polyhedron                                     | Deviation of Dy1 |
|-------------|----------|------------------------------------------------|------------------|
| $D_{8h}$    | OP-8     | Octagon                                        | 33.913           |
| $C_{7v}$    | HPY-8    | Heptagonal pyramid                             | 22.890           |
| $D_{6h}$    | HBPY-8   | Hexagonal bipyramid                            | 15.571           |
| $O_h$       | CU-8     | Cube                                           | 10.011           |
| $D_{4d}$    | SAP-8    | Square antiprism                               | 4.655            |
| $D_{2d}$    | TDD-8    | Triangular dodecahedron                        | 3.061            |
| $D_{2d}$    | JGBF-8   | Johnson - Gyrobifastigium (J26)                | 13.709           |
| $D_{3h}$    | JETBPY-8 | Johnson - Elongated triangular bipyramid (J14) | 25.838           |
| $C_{2v}$    | JBTP-8   | Johnson - Biaugmented trigonal prism (J50)     | 4.207            |
| $C_{2v}$    | BTPR-8   | Biaugmented trigonal prism                     | 3.350            |
| $D_{2d}$    | JSD-8    | Snub disphenoid (J84)                          | 6.163            |
| $T_d$       | TT-8     | Triakis tetrahedron                            | 10.735           |
| $D_{3h}$    | ETBPY-8  | Elongated trigonal bipyramid                   | 21.001           |

**Note:** The coordination geometry of Dy1 was labeled by red.

**Table S7.** The possible geometries of nona-coordination metal centers and Deviation parameters from each ideal polyhedron for Dy2 in **1**.

| Point group | Geometry | Polyhedron                                              | Deviation of Dy2 |
|-------------|----------|---------------------------------------------------------|------------------|
| $D_{9h}$    | EP-9     | Enneagon                                                | 36.050           |
| $C_{8v}$    | OPY-9    | Octagonal pyramid                                       | 24.070           |
| $D_{7h}$    | HBPY-9   | Heptagonal bipyramid                                    | 18.705           |
| $C_{3v}$    | JTC-9    | trivacant cuboctahedron                                 | 14.822           |
| $C_{4v}$    | JCCU-9   | Capped cube (Elongated square pyramid, J8)              | 9.952            |
| $C_{4v}$    | CCU-9    | Capped cube                                             | 8.482            |
| $C_{4v}$    | JCSAPR-9 | Capped sq. antiprism (Gyroelongated square pyramid J10) | 3.530            |
| $C_{4v}$    | CSAPR-9  | Capped square antiprism                                 | 2.569            |
| $D_{3h}$    | JTCTPR-9 | Tricapped trigonal prism (J51)                          | 4.566            |
| $D_{3h}$    | TCTPR-9  | Tricapped trigonal prism                                | 3.144            |
| $C_{3v}$    | JTDIC-9  | Tridiminished icosahedron (J63)                         | 13.145           |
| $C_{2v}$    | HH-9     | Hula-hoop                                               | 10.366           |
| $C_s$       | MFF-9    | Muffin                                                  | 1.971            |

**Note:** The coordination geometry of Dy2 was labeled by red.



**Table S8.** The possible geometries of oct-coordination metal centers and Deviation parameters from each ideal polyhedron for Dy1 in **2**.

| Point group | Geometry | Polyhedron                                     | Deviation of Dy1 |
|-------------|----------|------------------------------------------------|------------------|
| $D_{8h}$    | OP-8     | Octagon                                        | 24.859           |
| $C_{7v}$    | HPY-8    | Heptagonal pyramid                             | 25.533           |
| $D_{6h}$    | HBPY-8   | Hexagonal bipyramid                            | 14.615           |
| $O_h$       | CU-8     | Cube                                           | 9.488            |
| $D_{4d}$    | SAP-8    | Square antiprism                               | 1.405            |
| $D_{2d}$    | TDD-8    | Triangular dodecahedron                        | 2.878            |
| $D_{2d}$    | JGBF-8   | Johnson - Gyrobifastigium (J26)                | 11.456           |
| $D_{3h}$    | JETBPY-8 | Johnson - Elongated triangular bipyramid (J14) | 26.558           |
| $C_{2v}$    | JBTP-8   | Johnson - Biaugmented trigonal prism (J50)     | 1.853            |
| $C_{2v}$    | BTPR-8   | Biaugmented trigonal prism                     | 2.103            |
| $D_{2d}$    | JSD-8    | Snub disphenoid (J84)                          | 2.590            |
| $T_d$       | TT-8     | Triakis tetrahedron                            | 10.229           |
| $D_{3h}$    | ETBPY-8  | Elongated trigonal bipyramid                   | 23.455           |

**Note:** The coordination geometry of Dy1 was labeled by red.

**Table S9.** The details of the parameters of square antiprism (SAP) of Dy<sup>III</sup> in **2**.

|                                           |                                           |                                                         |                                         |
|-------------------------------------------|-------------------------------------------|---------------------------------------------------------|-----------------------------------------|
| Skew angle ( $\phi$ , °)                  |                                           | Skew angle ( $\phi$ , °)                                |                                         |
| $\phi_1 = 35.61(1)$                       | $\phi_2 = 51.95(1)$                       | $\phi_3 = 39.30(1)$                                     | $\phi_4 = 53.15(2)$                     |
| Mean value of $\phi = 45.00(1)$           |                                           |                                                         |                                         |
| Parameter $\gamma$ (°)                    |                                           | Magic angles $\alpha$ (°)                               |                                         |
| $\gamma(\text{O15-Dy1-O11}) = 128.20$     | $\gamma(\text{O12-Dy1-O14}) = 111.60$     | $\alpha(\text{O15-O11}) = 64.10$                        | $\alpha(\text{O12-O14}) = 55.80$        |
| $\gamma(\text{O18-Dy1-O8}) = 111.68$      | $\gamma(\text{O9-Dy1-O17}) = 133.01$      | $\alpha(\text{O18-O8}) = 55.84$                         | $\alpha(\text{O9-O17}) = 66.51$         |
| Mean value of $\gamma = 121.12$           |                                           | Mean value of $\alpha = 60.56$                          |                                         |
| Values of $d_{\text{in}}$ (Å)             |                                           | Values of $d_{\text{pp}}(\text{A-B})$ (Å)               |                                         |
| $d_{\text{in}}(\text{O14-O15}) = 2.98(6)$ | $d_{\text{in}}(\text{O15-O12}) = 2.85(5)$ | $d_{\text{pp}}(\text{O11-B}) = 2.24(1)$                 | $d_{\text{pp}}(\text{O12-B}) = 2.41(8)$ |
| $d_{\text{in}}(\text{O12-O11}) = 2.98(6)$ | $d_{\text{in}}(\text{O11-O14}) = 2.86(5)$ | $d_{\text{pp}}(\text{O15-B}) = 2.22(5)$                 | $d_{\text{pp}}(\text{O14-B}) = 2.41(8)$ |
| $d_{\text{in}}(\text{O18-O17}) = 3.03(6)$ | $d_{\text{in}}(\text{O17-O8}) = 2.97(6)$  | $d_{\text{pp}}(\text{O9-B}) = 2.21(0)$                  | $d_{\text{pp}}(\text{O8-B}) = 2.45(5)$  |
| $d_{\text{in}}(\text{O8-O9}) = 3.01(6)$   | $d_{\text{in}}(\text{O9-O18}) = 2.95(6)$  | $d_{\text{pp}}(\text{O17-B}) = 2.17(9)$                 | $d_{\text{pp}}(\text{O18-B}) = 2.43(2)$ |
| Mean value of $d_{\text{in}} = 2.95$      |                                           | $d_{\text{pp}}^{\#}(\text{A-B}) = 2.32$                 | $d_{\text{pp}}^* = 2.31$                |
| Dihedral angle ( $\theta$ , °)            |                                           | $\sigma_{\phi}^2$ and $\sigma_{\alpha}^2$               |                                         |
| $\theta = 0.40$                           |                                           | $\sigma_{\phi}^2 = 58.85$ , $\sigma_{\alpha}^2 = 57.17$ |                                         |

**Note:** The means of the parameters:  $\phi$  is skew angle between the diagonals of two square faces,  $\alpha$  is the magic angles between the pseudo  $S_8$  axis and the directions of the Dy-O bonds,  $d_{\text{in}}$  is the distances between the coordination atoms in each plane,  $d_{\text{pp}}$  is the interplanar distances between two planes and  $\theta$  is the angle between two square planes.  $\phi_1 = \phi(\text{O12O14}[\text{Dy1}]\text{O18O8})$ ,  $\phi_2 = \phi(\text{O18O8}[\text{Dy1}]\text{O15O11})$ ,  $\phi_3 = \phi(\text{O15O11}[\text{Dy1}]\text{O17O9})$  and  $\phi_4 = \phi(\text{O17O9}[\text{Dy1}]\text{O12O14})$ , in which [Dy] represents Dy used doubly with its left two atoms and its right two atoms to form two planes, for example,  $\phi(\text{O12O14}[\text{Dy1}]\text{O18O8})$  means the dihedral angle of O12O14Dy1 plane and Dy1O18O8 plane. The  $d_{\text{pp}}(\text{A-B})$  means the distance between coordination A in the one plane and the other plane B.  $d_{\text{pp}}^{\#}(\text{A-B})$  represented the mean value of different  $d_{\text{pp}}(\text{A-B})$  values, while the  $d_{\text{pp}}^*$  value was calculated using the program Mercury by defining the centroids of the upper and lower planes and then measuring the distances of between centroids. The  $\theta$  means the dihedral angle between the upper and lower planes.

**Table S10.** Best fitted parameters obtained for the extended Debye model with ac susceptibility data from SQUID magnetometer of compound **1** under a zero dc applied field.

| $T(K)$  | $\chi_s$    | $\chi_T$ | $\tau(s)$  | $\alpha$ | Residual   |
|---------|-------------|----------|------------|----------|------------|
| 1.80137 | 1.96219E-14 | 1.76809  | 1.44891E-5 | 0.25406  | 0.00109    |
| 2.08055 | 2.6894E-14  | 1.58717  | 1.48348E-5 | 0.24617  | 0.00101    |
| 2.40036 | 1.95686E-14 | 1.44668  | 1.41748E-5 | 0.26697  | 6.71037E-4 |
| 2.70024 | 1.77054E-14 | 1.32512  | 1.4305E-5  | 0.26643  | 5.19016E-4 |
| 3.00088 | 2.20479E-14 | 1.2218   | 1.47695E-5 | 0.25591  | 2.57314E-4 |
| 3.30059 | 2.6752E-14  | 1.13293  | 1.48864E-5 | 0.25135  | 1.92183E-4 |
| 3.60058 | 4.04169E-14 | 1.05583  | 1.51433E-5 | 0.2379   | 2.57081E-4 |
| 3.90088 | 4.78103E-14 | 0.98904  | 1.50835E-5 | 0.23287  | 2.65037E-4 |
| 4.20008 | 5.34399E-14 | 0.93058  | 1.47261E-5 | 0.23354  | 2.3244E-4  |

**Table S11.** Best fitted parameters obtained for the extended Debye model with ac susceptibility data from SQUID magnetometer of compound **1** under a 600 Oe applied field.

| $T$ | $\chi_s(\text{Total})$ | $\chi_{T1}$ | $\tau_1(s)$ | $\alpha_1$ | $\chi_{T2}$ | $\tau_2(s)$ | $\alpha_2$ | Residual   |
|-----|------------------------|-------------|-------------|------------|-------------|-------------|------------|------------|
| 1.8 | 0.12963                | 0.95398     | 3.1625E-5   | 1.36634E-8 | 0.66981     | 0.00131     | 0.21113    | 0.001      |
| 2.1 | 2.39718E-7             | 0.97318     | 2.57641E-5  | 2.87137E-8 | 0.59375     | 0.00111     | 0.19283    | 0.00103    |
| 2.4 | 2.78297E-7             | 0.89463     | 2.48247E-5  | 2.93387E-8 | 0.53735     | 0.00103     | 0.1758     | 0.00117    |
| 2.7 | 3.94359E-7             | 0.81769     | 2.40008E-5  | 3.23769E-8 | 0.50057     | 9.38022E-4  | 0.1937     | 9.81993E-4 |
| 3.0 | 4.2648E-7              | 0.77931     | 2.50445E-5  | 5.15524E-8 | 0.42442     | 8.6531E-4   | 0.14585    | 0.00114    |
| 3.3 | 5.11941E-7             | 0.72718     | 2.36267E-5  | 5.74981E-8 | 0.39289     | 7.67276E-4  | 0.14666    | 0.00105    |
| 3.6 | 6.31068E-7             | 0.69711     | 2.43439E-5  | 6.40084E-8 | 0.34268     | 7.16314E-4  | 0.10997    | 9.85498E-4 |
| 3.9 | 7.89659E-7             | 0.65984     | 2.32884E-5  | 9.55027E-8 | 0.31911     | 6.45443E-4  | 0.10987    | 6.23672E-4 |
| 4.2 | 1.20062E-6             | 0.62923     | 2.2495E-5   | 1.17538E-7 | 0.2976      | 5.90074E-4  | 0.11342    | 3.68535E-4 |
| 4.5 | 1.31251E-6             | 0.60265     | 2.22327E-5  | 1.37212E-7 | 0.27383     | 5.26295E-4  | 0.11692    | 2.58744E-4 |
| 4.8 | 1.90687E-6             | 0.59468     | 2.36595E-5  | 1.68623E-7 | 0.23273     | 5.0285E-4   | 0.0838     | 2.21338E-4 |
| 5.1 | 1.64222E-6             | 0.57166     | 2.28776E-5  | 1.81617E-7 | 0.21747     | 4.41716E-4  | 0.1076     | 3.08366E-4 |
| 5.4 | 1.30543E-6             | 0.569       | 2.38952E-5  | 3.0815E-7  | 0.17994     | 4.17205E-4  | 0.07055    | 1.79428E-4 |
| 5.7 | 1.45824E-6             | 0.56432     | 2.52692E-5  | 4.46865E-7 | 0.14876     | 3.96732E-4  | 0.06492    | 1.13006E-4 |
| 6.0 | 2.64189E-6             | 0.5592      | 2.54458E-5  | 4.64488E-7 | 0.12394     | 3.72945E-4  | 0.06424    | 1.18873E-4 |

**Note:** The values of  $\alpha_1$  were labelled with red to see easily, and the too small values obviously indicate that it is not reasonable for  $\alpha_1$ .

**Table S12.** Best fitted parameters obtained for the extended Debye model with ac susceptibility data from SQUID magnetometer of compound **1** under a 600 Oe applied field.

| $T(K)$ | $\chi_s$ | $\chi_T$ | $\tau (s)$ | $\alpha$ | Residual   |
|--------|----------|----------|------------|----------|------------|
| 1.8    | 0.91403  | 1.76322  | 8.61574E-4 | 0.28455  | 0.00175    |
| 2.1    | 0.83022  | 1.57302  | 7.59847E-4 | 0.25302  | 0.00157    |
| 2.4    | 0.78197  | 1.43628  | 7.51273E-4 | 0.22455  | 0.00122    |
| 2.7    | 0.69387  | 1.32249  | 6.46576E-4 | 0.24727  | 8.26882E-4 |
| 3.0    | 0.65396  | 1.20744  | 5.86581E-4 | 0.20645  | 0.00105    |
| 3.3    | 0.6034   | 1.1232   | 5.11705E-4 | 0.20567  | 8.98117E-4 |
| 3.6    | 0.57722  | 1.0424   | 4.78734E-4 | 0.17106  | 9.71468E-4 |
| 3.9    | 0.54649  | 0.98111  | 4.33769E-4 | 0.16577  | 5.45506E-4 |
| 4.2    | 0.531    | 0.92848  | 4.1172E-4  | 0.15807  | 2.72521E-4 |
| 4.5    | 0.49949  | 0.87787  | 3.55047E-4 | 0.16022  | 1.4953E-4  |
| 4.8    | 0.48989  | 0.82856  | 3.33546E-4 | 0.12808  | 1.93779E-4 |
| 5.1    | 0.46678  | 0.79007  | 2.86498E-4 | 0.14397  | 2.42954E-4 |
| 5.4    | 0.45673  | 0.74976  | 2.59073E-4 | 0.11109  | 1.20725E-4 |
| 5.7    | 0.41957  | 0.71391  | 2.03697E-4 | 0.11941  | 6.09862E-5 |
| 6.0    | 0.41317  | 0.68379  | 1.82182E-4 | 0.11181  | 7.16611E-5 |

**Table S13.** Best fitted parameters obtained for the extended Debye model with ac susceptibility data from SQUID magnetometer of complex **2** in the 800 Oe applied field.

|   | $T(\text{K})$ | $x_S$      | $x_T$   | $\tau$ (s) | $\alpha$ | Residual   |
|---|---------------|------------|---------|------------|----------|------------|
| 1 | 1.8           | 1.24799E-8 | 2.17991 | 1.23352E-5 | 0.4413   | 0.00422    |
| 2 | 2.1           | 1.98958E-8 | 1.97918 | 3.76945E-6 | 0.53084  | 0.00236    |
| 3 | 2.4           | 4.79783E-8 | 1.75823 | 1.38873E-6 | 0.55388  | 0.00186    |
| 4 | 2.7           | 2.34398E-7 | 1.57904 | 4.06306E-7 | 0.59352  | 9.94526E-4 |
| 5 | 3.0           | 5.66147E-6 | 1.4209  | 1.48052E-7 | 0.61673  | 0.00105    |
| 6 | 3.3           | 1.47348E-5 | 1.29382 | 1.20124E-8 | 0.69373  | 2.99838E-4 |

**Table S14.** Details of the  $E_a$  and  $\tau_0$  parameters of **2** obtained by the equation of  $\ln(\chi''/\chi') = \ln(\omega\tau_0) + E_a/(k_B T)$ .

| Frequencies (Hz) | $E_a$ (K) | $\tau_0$ (s)          | Frequencies (Hz) | $E_a$ (K) | $\tau_0$ (s)          |
|------------------|-----------|-----------------------|------------------|-----------|-----------------------|
| 32               | 5.83      | $4.22 \times 10^{-6}$ | 251              | 6.80      | $1.25 \times 10^{-6}$ |
| 45               | 6.22      | $3.24 \times 10^{-6}$ | 355              | 6.25      | $1.39 \times 10^{-6}$ |
| 63               | 6.43      | $2.66 \times 10^{-6}$ | 500              | 6.24      | $1.17 \times 10^{-6}$ |
| 89               | 6.72      | $2.03 \times 10^{-6}$ | 708              | 6.27      | $9.57 \times 10^{-7}$ |
| 125              | 6.91      | $1.64 \times 10^{-6}$ | 999              | 6.17      | $8.20 \times 10^{-7}$ |
| 177              | 6.93      | $1.39 \times 10^{-6}$ | Mean values      | 6.43      | $1.89 \times 10^{-6}$ |

**Table S15.** The structural and magnetic parameters of the selected Co<sup>III</sup>-Dy heterometallic complexes reported recently.

| Co-Dy complex                                                                                                                                                                                                                                                               | ( $U_{\text{eff}}/k_B$ )/K            | Geometries   | Topology     | Ref. |
|-----------------------------------------------------------------------------------------------------------------------------------------------------------------------------------------------------------------------------------------------------------------------------|---------------------------------------|--------------|--------------|------|
| [L <sub>1</sub> Co <sup>III</sup> Br <sub>2</sub> Dy <sup>III</sup> (acac) <sub>2</sub> ] $\cdot$ CH <sub>2</sub> Cl <sub>2</sub>                                                                                                                                           | 312.26 <sup>i</sup>                   | BTPR-8       | Linearity    | 21   |
| [L <sub>2</sub> Co <sup>III</sup> Cl <sub>2</sub> Dy <sup>III</sup> (acac)Cl(MeOH)]                                                                                                                                                                                         | 285.04 <sup>i</sup>                   | BTPR-8       | Linearity    | 21   |
| [L <sub>2</sub> Co <sup>III</sup> Cl <sub>2</sub> Dy <sup>III</sup> (acac)Cl(H <sub>2</sub> O)]                                                                                                                                                                             | 220.88 <sup>i</sup>                   | BTPR-8       | Linearity    | 21   |
| [Co <sup>III</sup> <sub>2</sub> Dy <sup>III</sup> <sub>2</sub> (OH) <sub>2</sub> (bdea) <sub>2</sub> (acac) <sub>2</sub> (NO <sub>3</sub> ) <sub>4</sub> ]                                                                                                                  | 169 <sup>ii</sup>                     | SAP-8        | Butterfly    | 24   |
| [Co <sup>III</sup> <sub>2</sub> Dy <sup>III</sup> <sub>2</sub> (OMe) <sub>2</sub> (teaH) <sub>2</sub> (piv) <sub>6</sub> ]                                                                                                                                                  | 127 <sup>i</sup>                      | SAP-8        | Butterfly    | 25   |
| [Co <sup>III</sup> <sub>2</sub> Dy <sup>III</sup> <sub>2</sub> ( $\mu_3$ -OH) <sub>2</sub> (o-tol) <sub>4</sub> (mdea) <sub>2</sub> (NO <sub>3</sub> ) <sub>2</sub> ]                                                                                                       | 116.9 <sup>i</sup>                    | SAP-8        | Butterfly    | 27   |
| [Co <sup>III</sup> <sub>4</sub> Dy <sup>III</sup> <sub>2</sub> (OH) <sub>2</sub> (teaH) <sub>2</sub> (tea) <sub>2</sub> (piv) <sub>6</sub> ]                                                                                                                                | 78 <sup>i</sup>                       | SAP-8        | Not reported | 32   |
| [Co <sup>III</sup> <sub>2</sub> Dy <sup>III</sup> <sub>2</sub> (L <sub>3</sub> ) <sub>2</sub> (pdm) <sub>2</sub> (CH <sub>3</sub> COO) <sub>2</sub> (CH <sub>3</sub> OH) <sub>2</sub> ](NO <sub>3</sub> ) <sub>2</sub>                                                      | 64.0(9) <sup>a,i</sup>                | MFF-9        | Linearity    | 29   |
| [Co <sup>III</sup> <sub>2</sub> Dy <sup>III</sup> <sub>2</sub> (HL)L{(py) <sub>2</sub> CO <sub>2</sub> }{(py) <sub>2</sub> C(OCH <sub>3</sub> )O}(NO <sub>3</sub> ) <sub>4</sub> CH <sub>3</sub> OH] $\cdot$ solv                                                           | 59.4 <sup>b,i</sup> (U <sub>1</sub> ) | TDD-8, MFF-9 | Star         | *    |
| .                                                                                                                                                                                                                                                                           |                                       |              |              |      |
| [Co <sup>III</sup> Dy <sup>III</sup> <sub>3</sub> (HBpz <sub>3</sub> ) <sub>6</sub> (dto) <sub>3</sub> ] $\cdot$ 4CH <sub>3</sub> CN $\cdot$ 2CH <sub>2</sub> Cl <sub>2</sub>                                                                                               | 52 <sup>c,ii</sup>                    | SAP-8        | Propeller    | 22   |
| [Co <sup>III</sup> <sub>4</sub> Dy <sup>III</sup> <sub>3</sub> L <sub>4</sub> ( $\mu_4$ -O) <sub>2</sub> ( $\mu$ -OMe) <sub>2</sub> ( $\mu_{1,3}$ -OAc) <sub>4</sub> (H <sub>2</sub> O) <sub>2</sub> (NO <sub>3</sub> ) <sub>2</sub> ] $\cdot$ NO <sub>3</sub> $\cdot$ sol. | 51.4 <sup>iii</sup>                   | JTCTPR-9     | Sand clock   | 33   |
| [Dy <sup>III</sup> <sub>2</sub> Co <sup>III</sup> <sub>2</sub> (OH) <sub>2</sub> (teaH) <sub>2</sub> (acac) <sub>6</sub> ] $\cdot$ MeCN                                                                                                                                     | 45 <sup>ii</sup> (U <sub>1</sub> )    | SAP-8        | Butterfly    | 26   |
| [Co <sup>III</sup> <sub>4</sub> Dy <sup>III</sup> <sub>4</sub> ( $\mu$ -F) <sub>4</sub> ( $\mu_3$ -OH) <sub>4</sub> (o-tol) <sub>8</sub> (mdea) <sub>4</sub> ]                                                                                                              | 39 <sup>ii</sup>                      | BTP-8        | Square       | 34   |
| [Dy <sup>III</sup> <sub>2</sub> Co <sup>III</sup> <sub>2</sub> (OH) <sub>2</sub> (bdea) <sub>2</sub> (acac) <sub>6</sub> ] $\cdot$ 2H <sub>2</sub> O                                                                                                                        | 38 <sup>ii</sup>                      | SAP-8        | Butterfly    | 26   |
| [Co <sup>III</sup> <sub>2</sub> Dy <sup>III</sup> <sub>2</sub> (L <sub>3</sub> ) <sub>2</sub> (CH <sub>3</sub> COO) <sub>4</sub> (OH) <sub>2</sub> (H <sub>2</sub> O) <sub>2</sub> ](ClO <sub>4</sub> ) <sub>2</sub>                                                        | 33.8 <sup>ii</sup>                    | TCTPR-9      | Linearity    | 30   |
| [Co <sup>III</sup> <sub>2</sub> Dy <sup>III</sup> <sub>4</sub> ( $\mu_3$ -OH) <sub>2</sub> (NO <sub>3</sub> ) <sub>4</sub> (OAc) <sub>4</sub> L <sub>4</sub> (DMF) <sub>2</sub> ]                                                                                           | 31.6 <sup>ii</sup>                    | SAP-8        | Chair-like   | 31   |
| [Dy <sup>III</sup> <sub>2</sub> Co <sup>III</sup> <sub>2</sub> (OH) <sub>2</sub> (edea) <sub>2</sub> (acac) <sub>6</sub> ] $\cdot$ 2H <sub>2</sub> O $\cdot$ 4MeCN                                                                                                          | 16 <sup>ii</sup>                      | SAP-8        | Butterfly    | 26   |
| [Co <sup>III</sup> <sub>2</sub> Dy <sup>III</sup> <sub>2</sub> (OCH <sub>3</sub> ) <sub>2</sub> (teaH) <sub>2</sub> (piv) <sub>6</sub> ]                                                                                                                                    | none                                  | SAP-8        | Butterfly    | 28   |

The parameters of the complex reported in this work was labeled by red. <sup>i</sup> $U_{\text{eff}}$  obtained by the equation of  $\tau^{-1} = CT^n + \tau_0^{-1}\exp(-U_{\text{eff}}/k_B T) + \tau_{\text{QTM}}^{-1}$ ; <sup>ii</sup> $U_{\text{eff}}$  obtained by the equation of  $\tau = \tau_0\exp(U_{\text{eff}}/k_B T)$ ; <sup>iii</sup>energy barrier ( $E_a$ ) obtained employing the equation  $\ln(\chi''/\chi') = \ln(\omega\tau_0) + E_a/(k_B T)$ . <sup>a, b, c</sup>show the ac susceptibility data measured under 2000, 600 and 800 Oe dc fields, respectively. BTPR-8 = biaugmented trigonal prism; SAP-8 = square antiprism; JTCTPR-9 = Tricapped trigonal prism (J51); TCTPR-9 = Tricapped trigonal prism; TDD-8 = triangular dodecahedron; MFF-9 = muffin. H<sub>2</sub>L<sub>1</sub> = N,N'-bis(2-oxy-3-methoxybenzylidene)-1,2-phenyl-enediamine; H<sub>2</sub>L<sub>2</sub> = N,N'-bis(2-oxy-3-methoxybenzylidene)-1,2-diaminocyclohexane; H<sub>2</sub>L<sub>3</sub> = N1,N3-bis(3-methoxysalicylidene)diethylenetriamine; H<sub>2</sub>L<sub>4</sub> = 3-methoxysalicylaldehyde and 2-amino-2-methyl-1-propanol; acac = acetylacetonate; bdeaH<sub>2</sub> = *n*-butyldiethanolamine; teaH<sub>3</sub> = triethanolamine; Hpiv = pivalic acid; o-tol = o-toluate; mdeaH<sub>2</sub> = N-methyldiethanolamine; pdmH<sub>2</sub> = 2,6-pyridinedimethanol; HBpz<sub>3</sub><sup>-</sup> = hydrotris(pyrazolyl)borate; dto<sup>2-</sup> = dithiooxalato dianion; edeaH<sub>2</sub> = N-ethyl-diethanolamine.

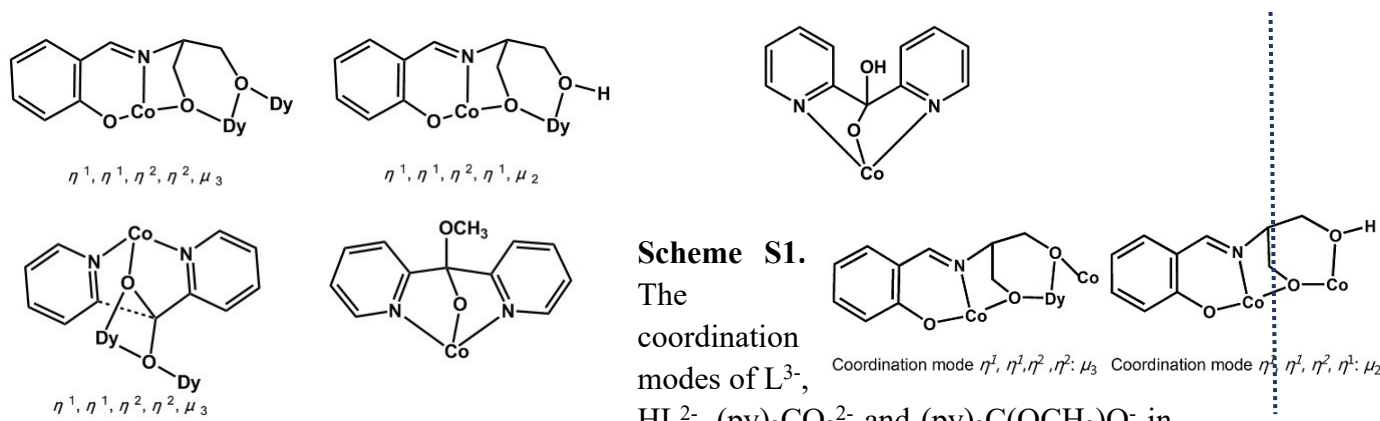

**1** (left) and  $L^{3-}$ ,  $HL^{2-}$  as well as  $(py)_2C(OH)O^-$  in **2** (right).

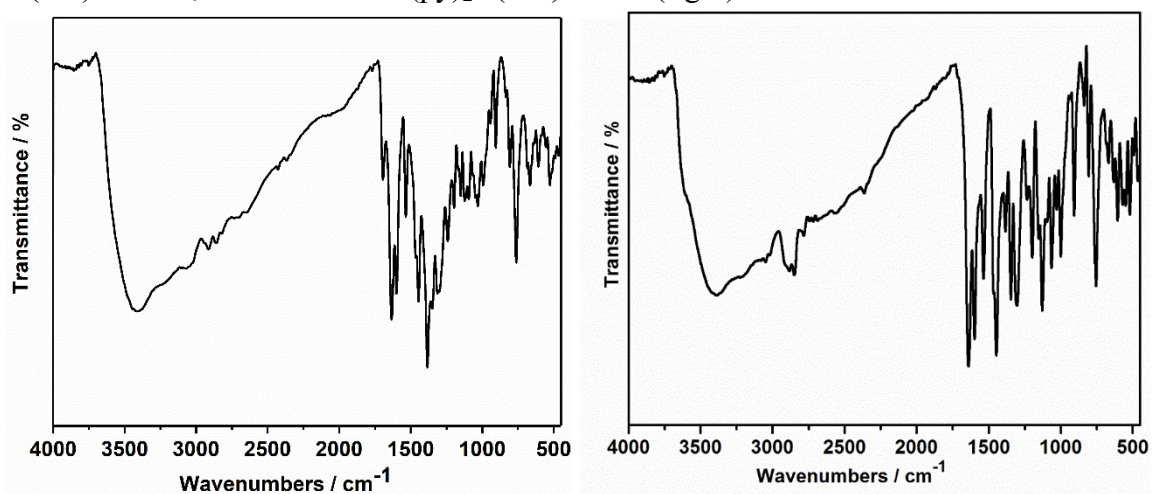

**Figure S1.** IR spectra of **1** (left) and **2** (right).

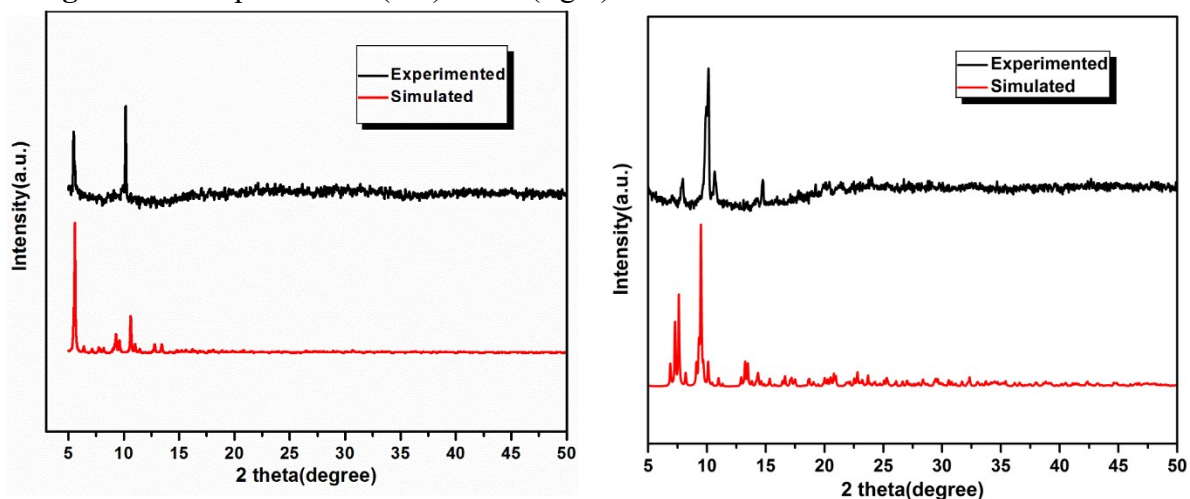

**Figure S2.** Experimental and simulated Powder X-ray diffraction (PXRD) of **1** (left) and **2** (right). Some peaks. Some minor peaks were lost, which could be due to the loss of some solvent molecules in the crystal lattice.

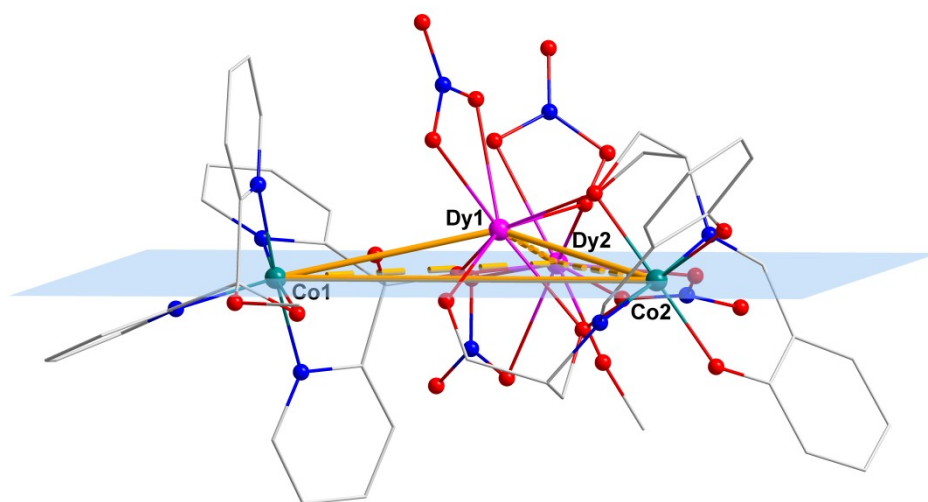

**Figure S3.** Plot shown two  $\text{Co}^{\text{III}}$  and two  $\text{Dy}^{\text{III}}$  of **1** in a shrinking trigonal pyramid.

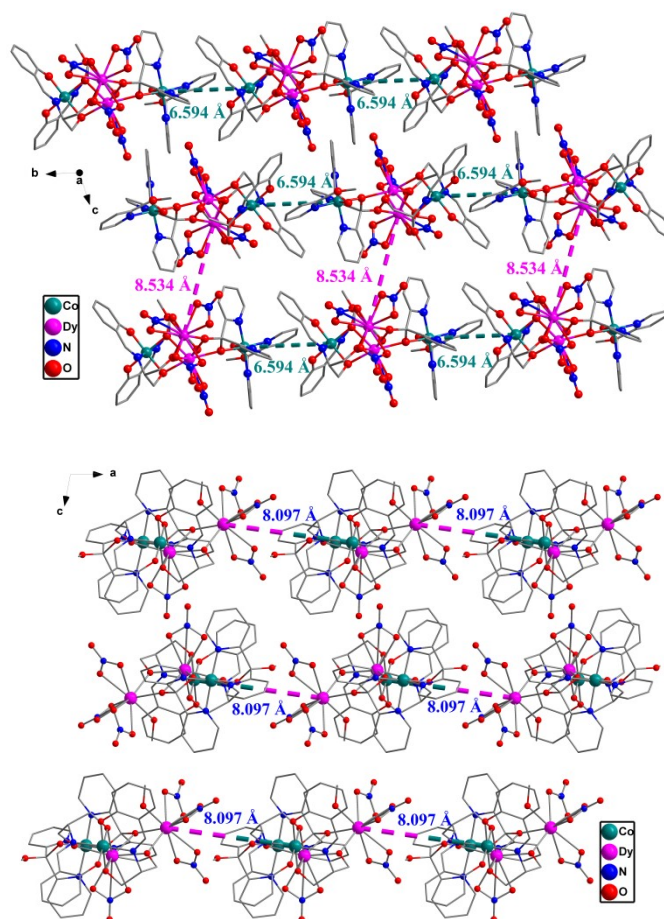

**Figure S4.** The plots shown the distances of the  $\text{Co}^{\text{III}}\cdots\text{Co}^{\text{III}}$  (teal, top),  $\text{Dy}^{\text{III}}\cdots\text{Dy}^{\text{III}}$  (pink, top) and  $\text{Dy}^{\text{III}}\cdots\text{Co}^{\text{III}}$  (blue, bottom) between molecules of **1** in the crystal lattice.



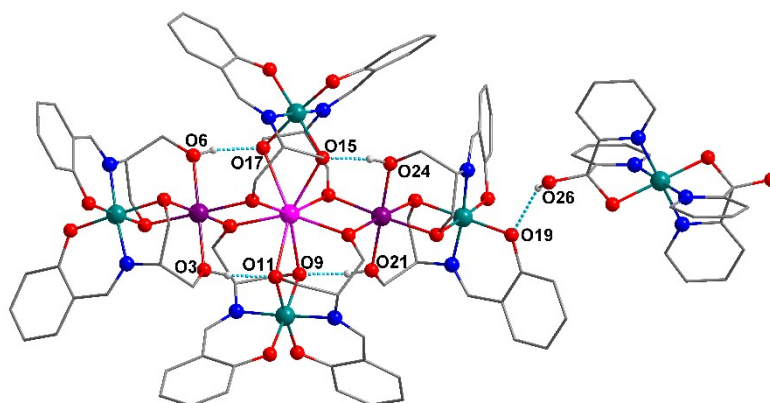

**Figure S5.** The intramolecular H bonds between the nondeprotonated hydroxyl groups and the neighboring O atoms in **2**.

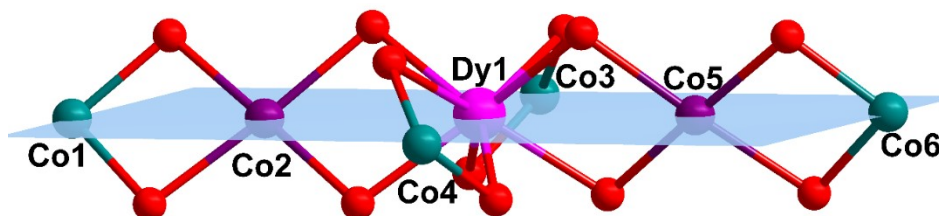

**Figure S6.** The plot shown the all metal ions in the  $[\text{Co}^{\text{II}}_2\text{Co}^{\text{III}}_4\text{Dy}^{\text{III}}(\text{HL})_4(\text{L})_4]^-$  anion of **1**.

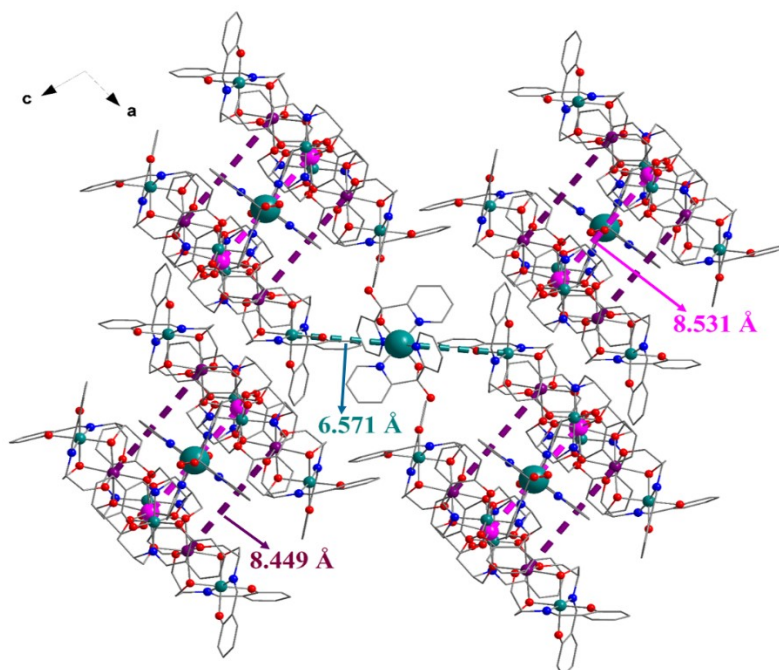

**Figure S7.** The plot shown the distances of the  $\text{Co}^{\text{III}}\cdots\text{Co}^{\text{III}}$  (teal),  $\text{Co}^{\text{II}}\cdots\text{Co}^{\text{II}}$  (violet) and  $\text{Dy}^{\text{III}}\cdots\text{Dy}^{\text{III}}$  (pink) between molecules of **1**.

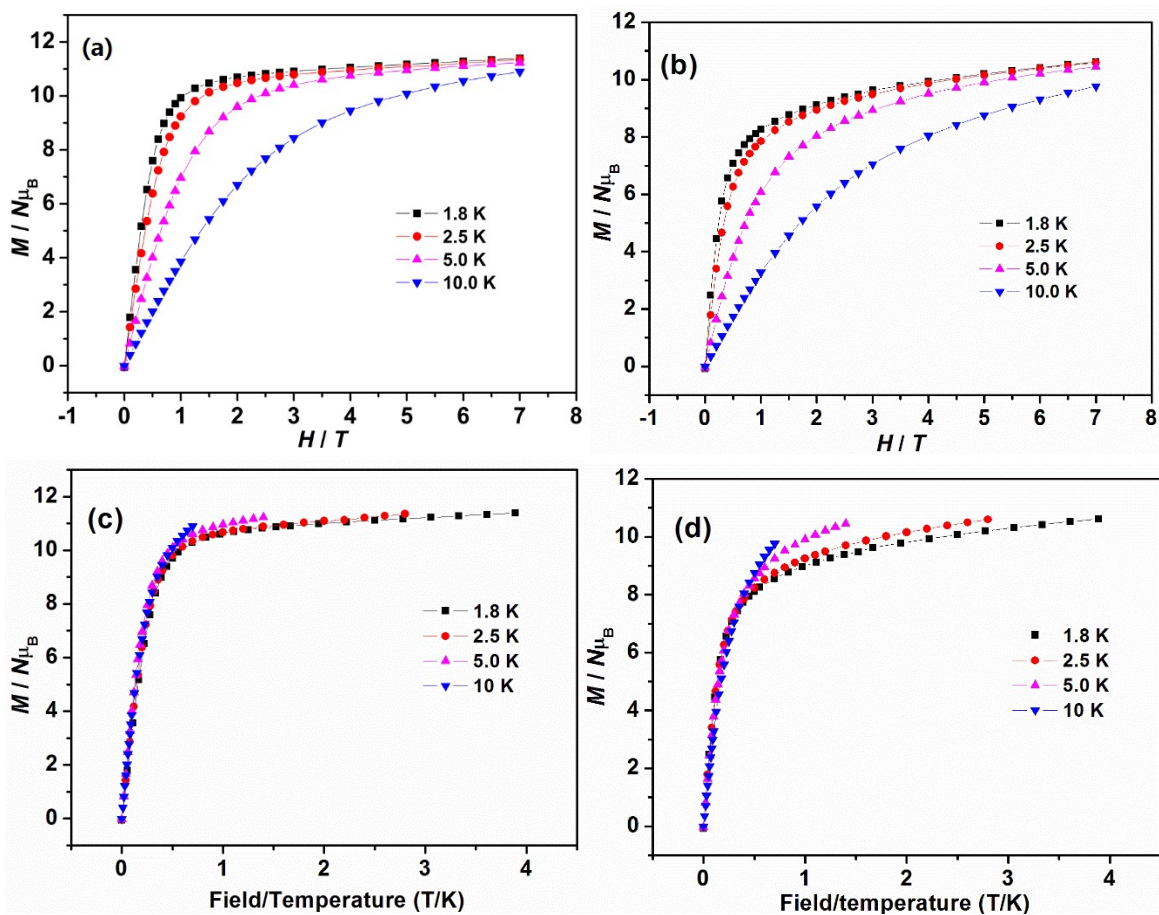

**Figure S8.** The plots of  $M$  vs.  $H$  for **1** (a) and **2** (b) and the plots of  $M$  vs.  $H/T$  for **1** (c) and **2**(d).

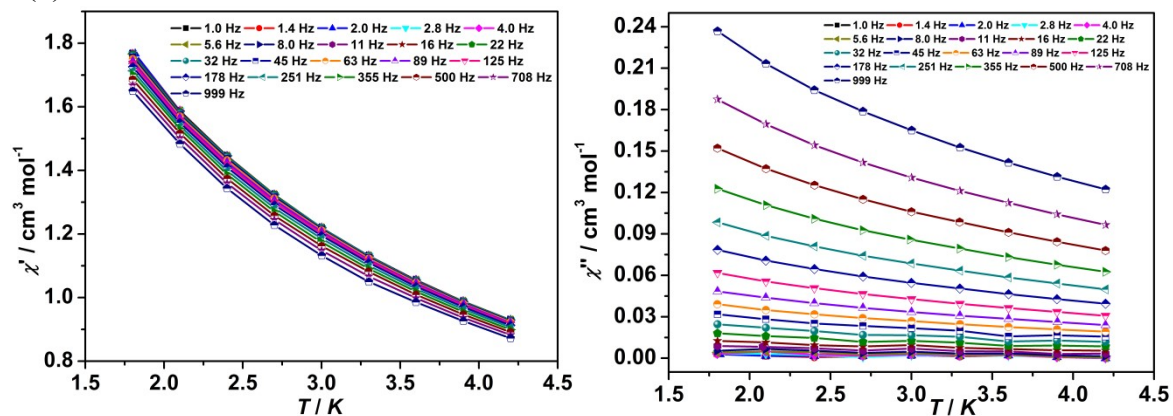

**Figure S9.** The temperature dependence of the in-phase ( $\chi'$ , left) and out-of-phase ( $\chi''$ , right) ac susceptibilities of **1** measured under a zero dc field.

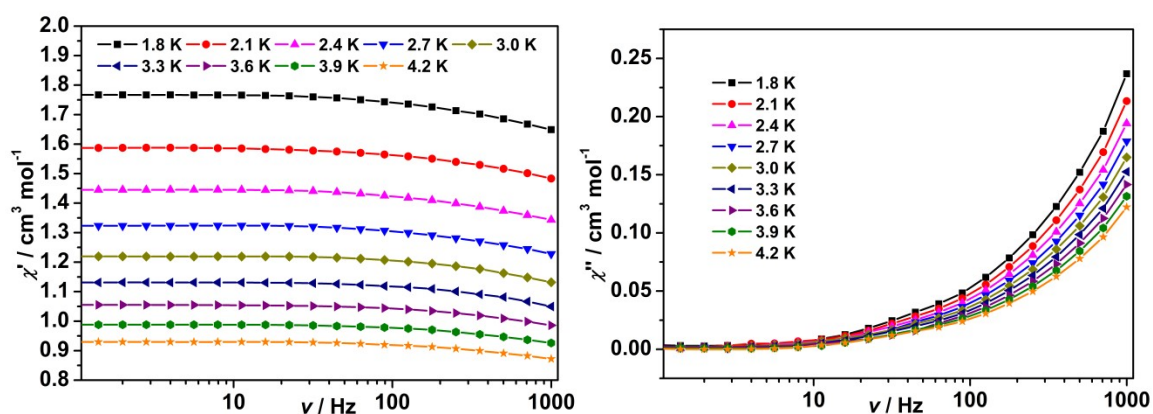

**Figure S10.** The frequency dependence of the in-phase ( $\chi'$ , left) and out-of-phase ( $\chi''$ , right) ac susceptibilities of **1** measured under a zero dc field.

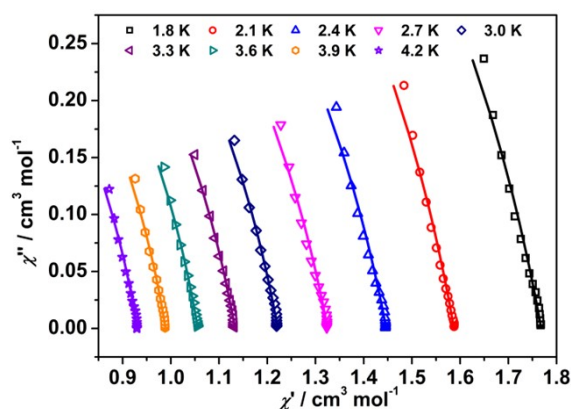

**Figure S11.** Cole-Cole plots of **1** measured under a zero dc field, in which solid lines represent the fitted results by the single relaxation Debye model.

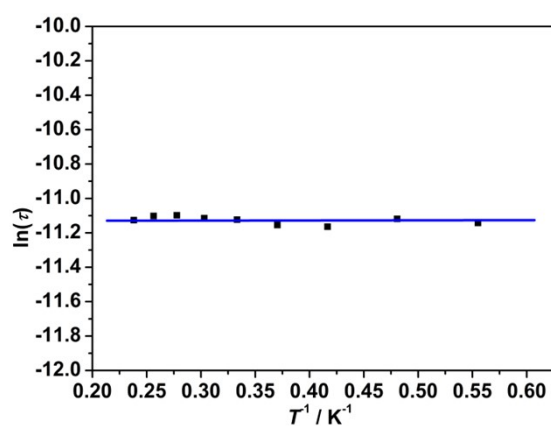

**Figure S12.** Plots of  $\ln(\tau)$  vs.  $T^{-1}$  for **1** measured under a zero dc field, in which the blue line to see easily and it is almost parallel  $T^{-1}$  axis, indicating that the slow magnetic relaxation behavior under a zero dc field was almost governed by pure quantum tunnelling of magnetization (QTM) process.

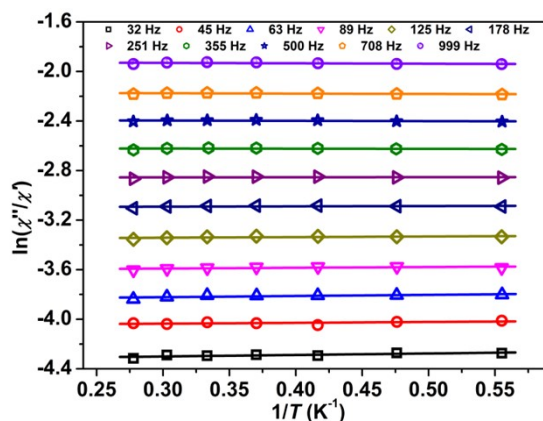

**Figure S13.** Linear approximation plots of  $(\chi''/\chi')$  vs  $T^{-1}$  at different frequencies for **1** measured under a zero dc field, the solid lines represent the fitted results by Bartolomé equation  $\ln(\chi''/\chi') = \ln(\omega\tau_0) + E_a/(k_B T)$ .

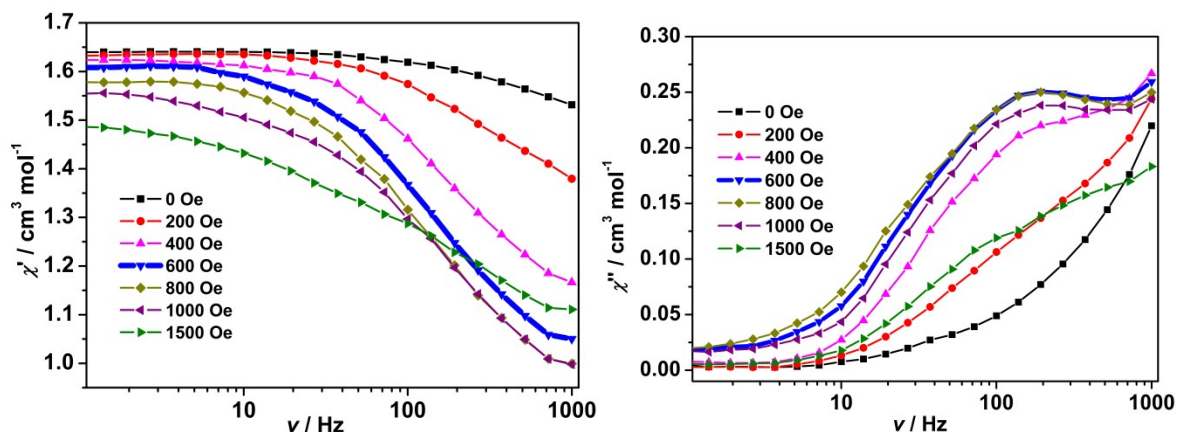

**Figure S14.** Frequency dependence of in-phase ( $\chi'$ , a) and out-of-phase ( $\chi''$ , b) ac signals for **1** under different dc fields at 1.8 K.

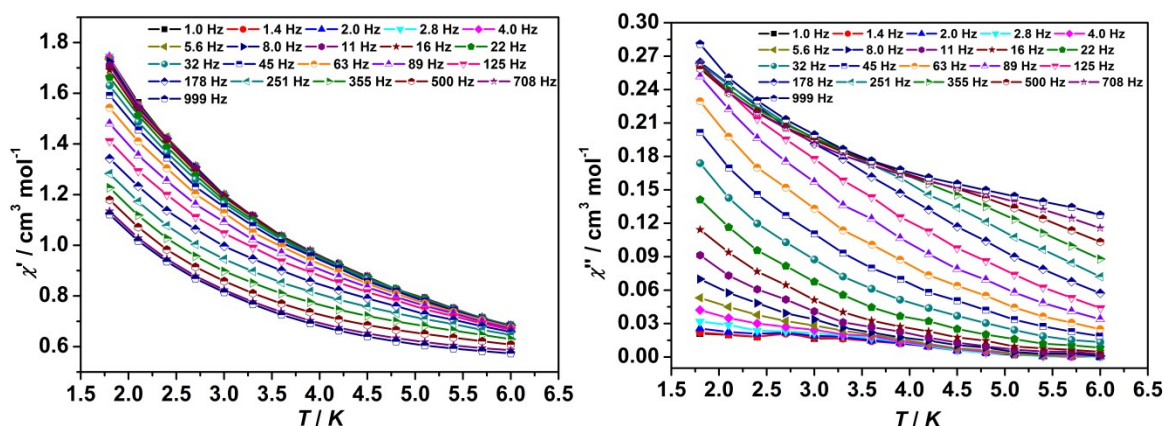

**Figure S15.** The temperature dependence of the in-phase ( $\chi'$ , left) and out-of-phase ( $\chi''$ , right) ac susceptibilities of **1** measured under a 600 Oe dc field.



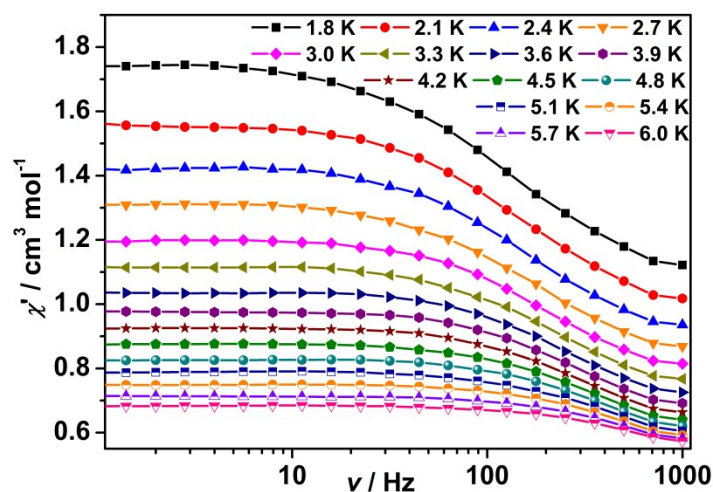

**Figure S16.** The frequency dependence of the in-phase ( $\chi'$ ) ac susceptibilities of **1** measured under a 600 Oe dc field.

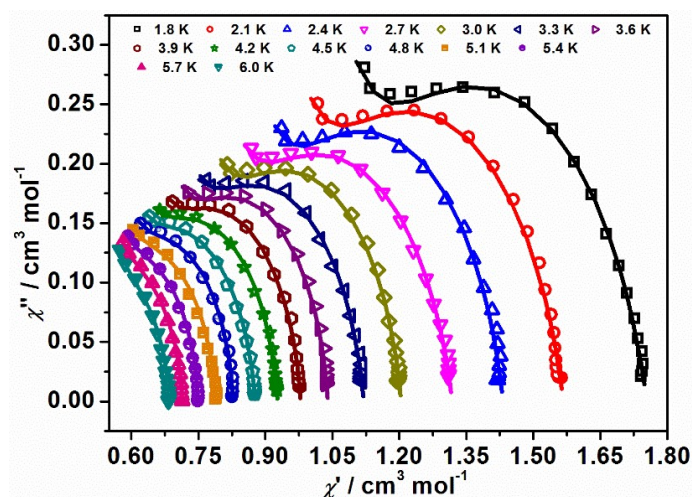

**Figure S17.** Cole-Cole plots of **1** measured under a 600 Oe dc field, in which solid lines represent the fitted results by the double relaxation Debye model.

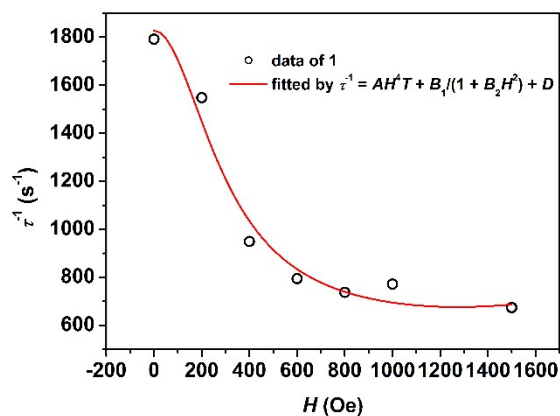

**Figure S18.** The plots of  $\tau^{-1}$  vs.  $H$  for **1**, in which the red solid line represents the fitted results by  $\tau^{-1} = AH^4T + B_1/(1 + B_2H^2) + D$ .

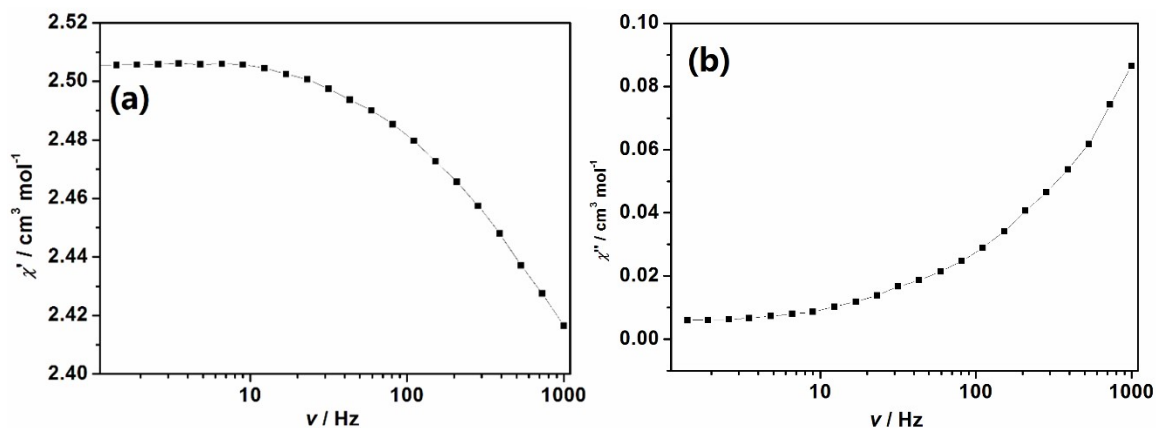

**Figure S19.** Plots of in-phase ( $\chi'$ , a) and out-of-phase ( $\chi''$ , b) versus  $\nu$  ( $\nu$  represents frequencies) for **2** under zero dc field at 1.8 K.

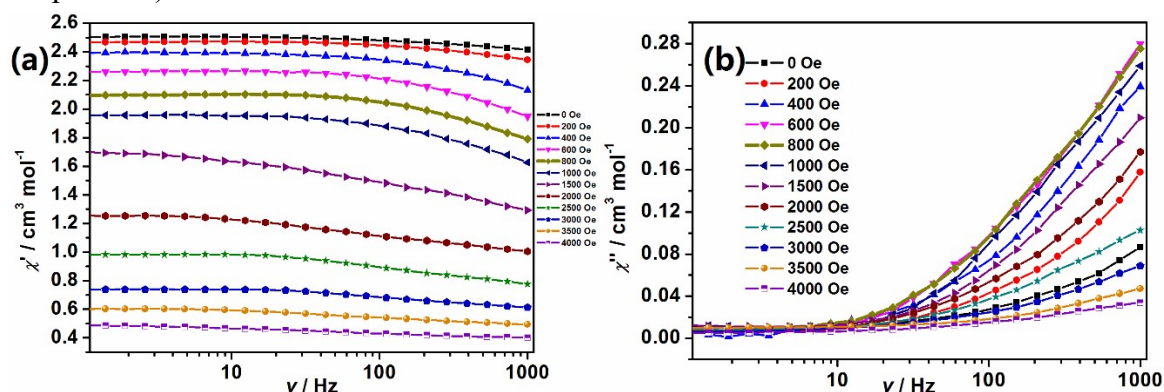

**Figure S20.** Frequency dependence of in-phase ( $\chi'$ , a) and out-of-phase ( $\chi''$ , b) ac signals for **2** under different dc fields at 1.8 K.

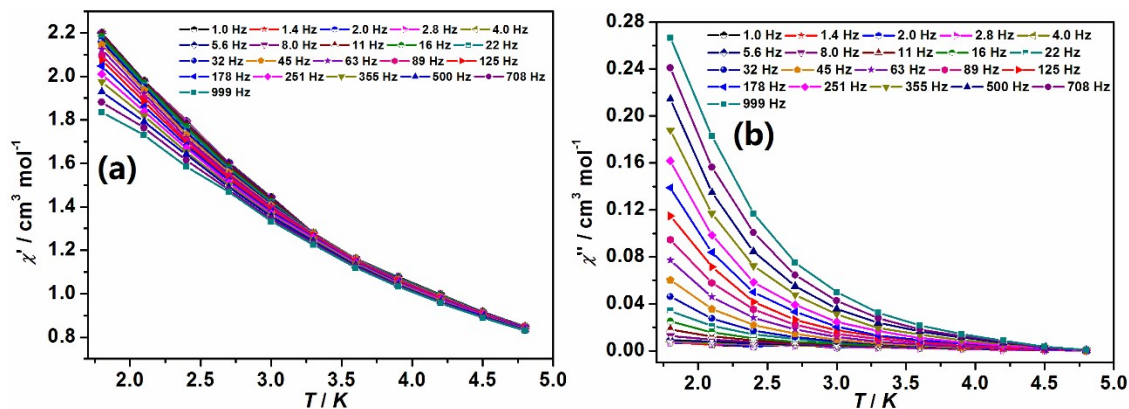

**Figure S21.** Temperature-dependence of in-phase ( $\chi'$ , a) and out-of-phase ( $\chi''$ , b) ac signals for **2** under an 800 Oe dc field with the temperatures in the range of 1.8-4.8 K.

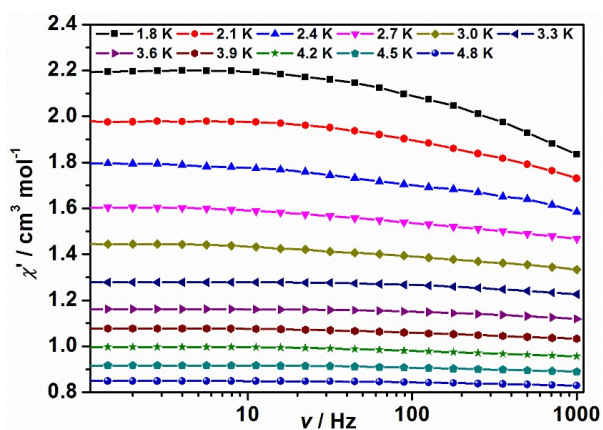

**Figure S22.** Plots of in-phase ( $\chi'$ ) versus  $\nu$  ( $\nu$  represents frequencies) for **2** under an 800 Oe dc field with the temperatures in the range of 1.8-4.8 K.

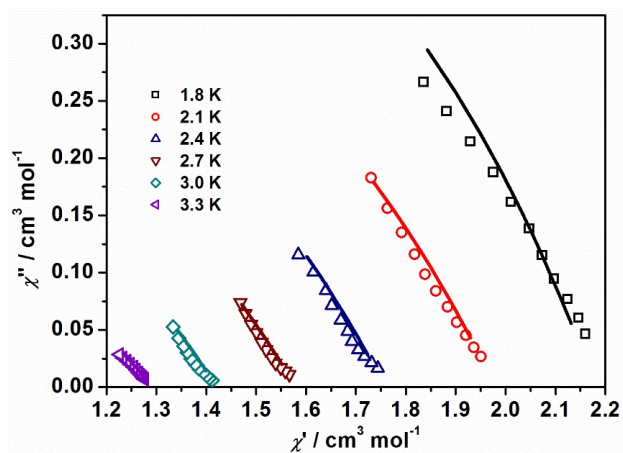

**Figure S23.** Cole-Cole plots for **2** measured under an 800 Oe dc field, the solid lines represent the fitted results by the single relaxation Debye model.

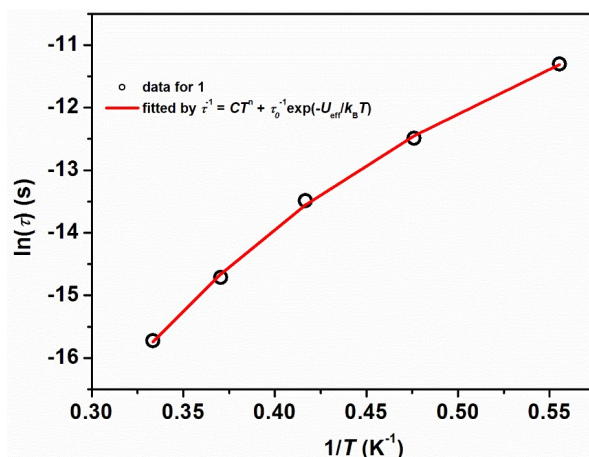

**Figure S24.**  $\ln(\tau)$  versus  $T^{-1}$  for **2** measured under an 800 Oe dc field, the solid lines represent the fitted results by the equation of  $\tau^{-1} = CT^n + \tau_0^{-1}\exp(-U_{\text{eff}}/k_B T)$ .

## Computational details

Complex **1** has two individual Dy<sup>III</sup> ions, which were indicated as **1\_Dy1** and **1\_Dy2**, respectively (Figure. S24). However, complex **2** contains one Dy<sup>III</sup> and two Co<sup>II</sup>, so their fragments were labeled as **2\_Dy**, **2\_Co1** and **2\_Co2**, respectively (Figure S25). Complete-active-space self-consistent field (CASSCF) calculations on **1\_Dy1** and **1\_Dy2** for **1** and **2\_Dy**, **2\_Co1** and **2\_Co2** for **2** on the basis of single-crystal X-ray determined geometries have been carried out with MOLCAS 8.4<sup>S1</sup> program package. All Co<sup>III</sup> ions are replaced with Sc<sup>III</sup> during the calculation processes. **1\_Dy1**, **1\_Dy2** and **2\_Dy** were calculated respectively keeping the experimentally determined structures of the corresponding compound while replacing the other Dy<sup>III</sup> ion with diamagnetic Lu<sup>III</sup>. **2\_Co1** and **2\_Co2** were calculated keeping the experimentally determined structures of the corresponding compounds while replacing the other Co<sup>II</sup> ion with diamagnetic Zn<sup>II</sup> and Dy<sup>III</sup> ion with diamagnetic Lu<sup>III</sup>.

For the first CASSCF calculation, the basis sets for all atoms are atomic natural orbitals from the MOLCAS ANO-RCC library: ANO-RCC-VTZP for Dy<sup>III</sup> and Co<sup>II</sup>; VTZ for close O atoms; VDZ for distant atoms. The calculations employed the second order Douglas-Kroll-Hess Hamiltonian, where scalar relativistic contractions were taken into account in the basis set. And then, the spin-orbit couplings were handled separately in the restricted active space state interaction (RASSI-SO) procedure. For the individual Dy<sup>III</sup> fragment, active electrons in 7 active orbitals include all *f* electrons (CAS (9 in 7)) in the CASSCF calculation. To exclude all the doubts, we calculated all the roots in the active space. We have mixed the maximum number of spin-free state which was possible with our hardware (all from 21 sextets, 128 from 224 quadruplets, 130 from 490 doublets). For the individual Co<sup>II</sup> fragment, active electrons in 5+5' active orbitals include all *d* electrons (CAS (7 in 5+5')) in the CASSCF calculations. We have mixed the maximum number of spin-free states (all from 10



quadruplets and all from 40 doublets for Co<sup>II</sup>). SINGLE\_ANISO<sup>[S2-S4]</sup> program was used to obtain the energy levels, **g** tensors,  $m_J$  values, spin-free energies, spin-orbit energies, magnetic axes, *et al.* based on the above CASSCF/RASSI-SO calculations.

To fit the exchange interactions between the magnetic centers in complexes **1** and **2**, we took two steps to obtain them. Firstly, we calculated individual Dy<sup>III</sup> and Co<sup>II</sup> fragments using CASSCF/RASSI-SO to obtain the corresponding magnetic properties. Then, the exchange interactions between the magnetic centers were considered within the Lines model,<sup>S5</sup> while the account of the dipole-dipole magnetic coupling was treated exactly. The Lines model is effective and has been successfully used widely in the research field of *d* and *f*-elements single-molecule magnets.<sup>S6,S7</sup>

For complex **1**, there is only one type of  $\mathcal{J}^{\circ}$  (Figure S26), so the Ising exchange Hamiltonians for **1** is:

$$H_{exch} = -\tilde{J} \hat{S}_{Dy1} \hat{S}_{Dy2}$$

However, for **2**, two types of  $\mathcal{J}^{\circ}$  were fitted due to asymmetry (Figure S27), and the Ising exchange Hamiltonian is:

$$H_{exch} = -\tilde{J}_1 \hat{S}_{Dy} \hat{S}_{Co1} - \tilde{J}_2 \hat{S}_{Dy} \hat{S}_{Co2}$$

In complexes **1** and **2**,  $\mathcal{J}^{\circ} = 25 \cos \varphi J$  and  $\tilde{J} = 15 \cos \varphi J$ , respectively, where  $\varphi$  is the angles between the anisotropy axes on two Dy<sup>III</sup> sites or between the anisotropy axes on Dy<sup>III</sup> and Co<sup>II</sup> sites, and  $J$  is the Lines exchange coupling parameter.  $\mathcal{J}_{total}^{\circ}$  is the parameter of the total magnetic interaction ( $\mathcal{J}_{total}^{\circ} = \mathcal{J}_{dip}^{\circ} + \mathcal{J}_{exch}^{\circ}$ ) between magnetic center ions.  $\tilde{S}_{Dy} = \tilde{S}_{Co} = 1/2$  shows the ground pseudospin values of the Dy<sup>III</sup> and Co<sup>II</sup> sites. The dipolar magnetic coupling can be calculated exactly, while the exchange coupling constant was fitted through comparison of the computed and measured magnetic susceptibilities using POLY\_ANISO program.<sup>S2-S4</sup>

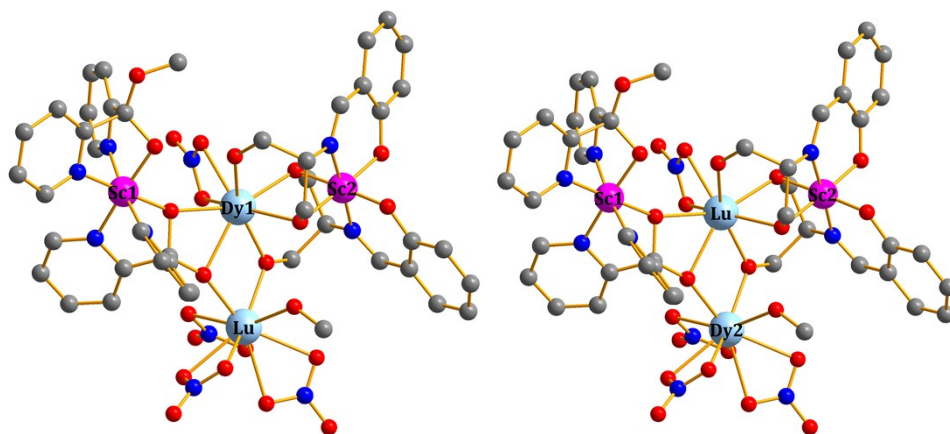

**Figure S25.** Calculated complete structures of **1\_Dy1** (left) and **1\_Dy2** (right); H atoms are omitted for clarify.

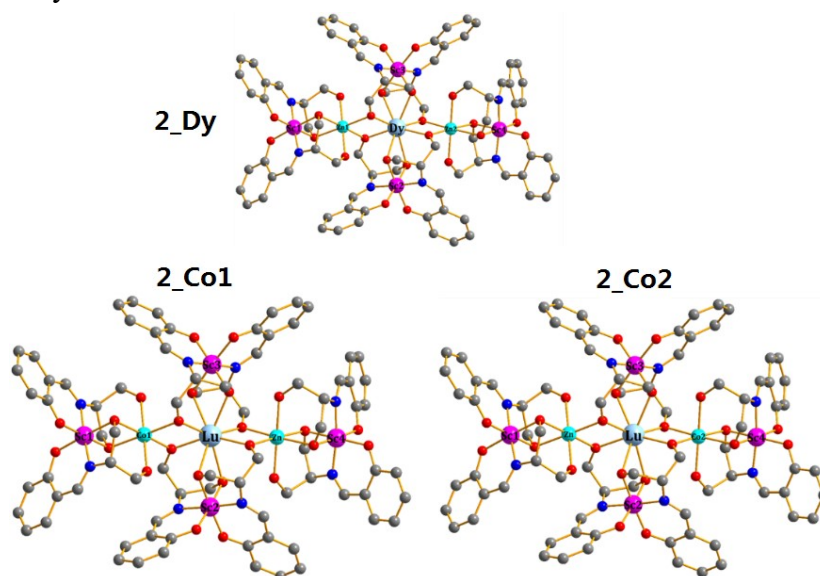

**Figure S26.** Calculated models of **2\_Dy**, **2\_Co1** and **2\_Co2** for **2**. H atoms are omitted for clarify.

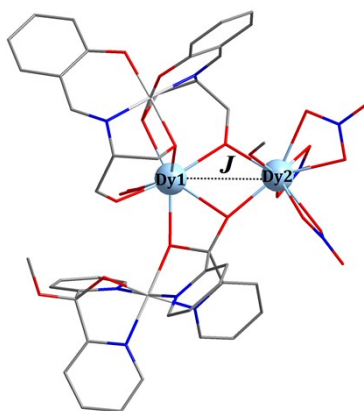

**Figure S27.** Scheme of the Dy<sup>III</sup>...Dy<sup>III</sup> anisotropic interaction in **1**.

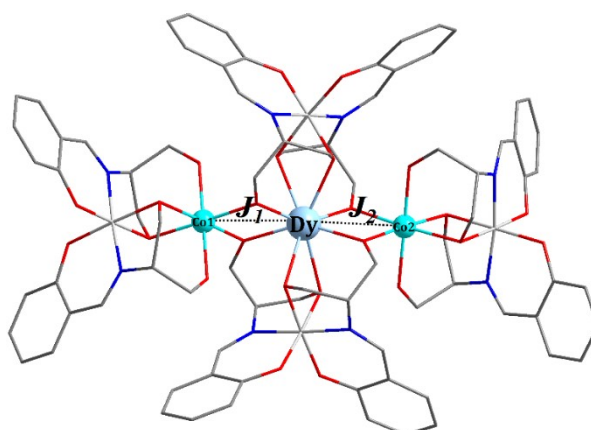

**Figure S28.** Scheme of the Dy<sup>III</sup>...Co<sup>II</sup> anisotropic interactions in **2**.

**Table S16.** Wave functions with definite projection of the total moment  $|m_J\rangle$  for the lowest eight KDs of **1\_Dy1**, **1\_Dy2** and **2\_Dy** using CASSCF/RASSI-SO with MOLCAS 8.4.

|              | $E/\text{cm}^{-1}$ | wave functions                                                                                                                                        |
|--------------|--------------------|-------------------------------------------------------------------------------------------------------------------------------------------------------|
| <b>1_Dy1</b> | 0.0                | 98.4% $ \pm 15/2\rangle$                                                                                                                              |
|              | 97.9               | 23.8% $ \pm 13/2\rangle$ +22.5% $ \pm 11/2\rangle$ +22.1% $ \pm 9/2\rangle$ +13.8% $ \pm 7/2\rangle$ +7.8% $ \pm 5/2\rangle$                          |
|              | 165.2              | 34.3% $ \pm 13/2\rangle$ +19.5% $ \pm 3/2\rangle$ +14.4% $ \pm 7/2\rangle$ +13.6% $ \pm 5/2\rangle$ +10.1% $ \pm 1/2\rangle$                          |
|              | 224.3              | 28.3% $ \pm 1/2\rangle$ +19.9% $ \pm 5/2\rangle$ +15.3% $ \pm 13/2\rangle$ +11.5% $ \pm 7/2\rangle$ +8.8% $ \pm 9/2\rangle$ +8.1% $ \pm 11/2\rangle$  |
|              | 264.9              | 35.9% $ \pm 3/2\rangle$ +28.8% $ \pm 1/2\rangle$ +12.0% $ \pm 13/2\rangle$ +11.9% $ \pm 5/2\rangle$ +7.9% $ \pm 11/2\rangle$                          |
|              | 351.8              | 26.8% $ \pm 5/2\rangle$ +18.7% $ \pm 1/2\rangle$ +17.2% $ \pm 3/2\rangle$ +14.4% $ \pm 7/2\rangle$ +9.5% $ \pm 11/2\rangle$ +8.6% $ \pm 13/2\rangle$  |
|              | 405.2              | 33.5% $ \pm 11/2\rangle$ +32.2% $ \pm 9/2\rangle$ +15.9% $ \pm 7/2\rangle$ +7.7% $ \pm 3/2\rangle$ +6.8% $ \pm 1/2\rangle$                            |
|              | 570.2              | 27.9% $ \pm 7/2\rangle$ +27.2% $ \pm 9/2\rangle$ +19.3% $ \pm 5/2\rangle$ +13.1% $ \pm 11/2\rangle$ +7.5% $ \pm 3/2\rangle$                           |
| <b>1_Dy2</b> | 0.0                | 99.3% $ \pm 15/2\rangle$                                                                                                                              |
|              | 214.4              | 84.0% $ \pm 13/2\rangle$ +5.9% $ \pm 5/2\rangle$ +4.5% $ \pm 1/2\rangle$                                                                              |
|              | 263.0              | 26.9% $ \pm 3/2\rangle$ +20.0% $ \pm 11/2\rangle$ +18.6% $ \pm 1/2\rangle$ +16.7% $ \pm 9/2\rangle$ +6.7% $ \pm 5/2\rangle$ +5.7% $ \pm 13/2\rangle$  |
|              | 291.9              | 23.5% $ \pm 7/2\rangle$ +19.5% $ \pm 1/2\rangle$ +18.4% $ \pm 5/2\rangle$ +18.0% $ \pm 11/2\rangle$ +7.5% $ \pm 9/2\rangle$ +6.7% $ \pm 13/2\rangle$  |
|              | 340.2              | 32.8% $ \pm 11/2\rangle$ +27.1% $ \pm 9/2\rangle$ +13.4% $ \pm 5/2\rangle$ +9.9% $ \pm 3/2\rangle$ +9.3% $ \pm 7/2\rangle$                            |
|              | 392.9              | 24.3% $ \pm 7/2\rangle$ +24.3% $ \pm 3/2\rangle$ +16.2% $ \pm 11/2\rangle$ +14.5% $ \pm 5/2\rangle$ +12.0% $ \pm 9/2\rangle$                          |
|              | 424.9              | 29.0% $ \pm 1/2\rangle$ +21.3% $ \pm 5/2\rangle$ +18.8% $ \pm 9/2\rangle$ +12.3% $ \pm 7/2\rangle$ +9.1% $ \pm 11/2\rangle$                           |
|              | 473.7              | 23.0% $ \pm 7/2\rangle$ +21.8% $ \pm 3/2\rangle$ +19.8% $ \pm 5/2\rangle$ +17.5% $ \pm 9/2\rangle$ +15.0% $ \pm 1/2\rangle$                           |
| <b>2_Dy</b>  | 0.0                | 62.8% $ \pm 15/2\rangle$ +11.0% $ \pm 13/2\rangle$ +8.1% $ \pm 9/2\rangle$ +6.9% $ \pm 11/2\rangle$ +4.7% $ \pm 5/2\rangle$                           |
|              | 13.7               | 23.7% $ \pm 7/2\rangle$ +17.4% $ \pm 13/2\rangle$ +17.1% $ \pm 5/2\rangle$ +12.5% $ \pm 9/2\rangle$ +11.3% $ \pm 15/2\rangle$ +9.9% $ \pm 3/2\rangle$ |
|              | 132.1              | 62.1% $ \pm 13/2\rangle$ +20.4% $ \pm 15/2\rangle$ +5.6% $ \pm 5/2\rangle$ +4.8% $ \pm 1/2\rangle$                                                    |
|              | 160.2              | 53.3% $ \pm 11/2\rangle$ +14.4% $ \pm 3/2\rangle$ +10.2% $ \pm 9/2\rangle$ +7.4% $ \pm 5/2\rangle$ +6.3% $ \pm 1/2\rangle$                            |
|              | 213.7              | 23.2% $ \pm 9/2\rangle$ +23.1% $ \pm 11/2\rangle$ +14.4% $ \pm 7/2\rangle$ +12.9% $ \pm 3/2\rangle$ +11.1% $ \pm 1/2\rangle$ +6.9% $ \pm 5/2\rangle$  |
|              | 270.0              | 38.9% $ \pm 1/2\rangle$ +23.1% $ \pm 5/2\rangle$ +20.3% $ \pm 19/2\rangle$ +5.7% $ \pm 7/2\rangle$ +5.6% $ \pm 11/2\rangle$                           |
|              | 312.9              | 34.9% $ \pm 3/2\rangle$ +30.1% $ \pm 1/2\rangle$ +19.1% $ \pm 7/2\rangle$ +12.4% $ \pm 9/2\rangle$                                                    |
|              | 518.8              | 33.0% $ \pm 5/2\rangle$ +28.2% $ \pm 7/2\rangle$ +18.0% $ \pm 3/2\rangle$ +12.3% $ \pm 9/2\rangle$                                                    |

**Table S17.** Calculated energy levels ( $\text{cm}^{-1}$ ),  $\mathbf{g}$  ( $g_x, g_y, g_z$ ) tensors and predominant  $m_J$  values of the lowest eight Kramers doublets (KDs) of **1\_Dy1**, **1\_Dy2** and **2\_Dy** using CASSCF/RASSI-SO with MOLCAS 8.4.

| KDs | 1_Dy1              |              |            | 1_Dy2              |              |            | 2_Dy               |              |            |
|-----|--------------------|--------------|------------|--------------------|--------------|------------|--------------------|--------------|------------|
|     | $E/\text{cm}^{-1}$ | $\mathbf{g}$ | $m_J$      | $E/\text{cm}^{-1}$ | $\mathbf{g}$ | $m_J$      | $E/\text{cm}^{-1}$ | $\mathbf{g}$ | $m_J$      |
| 1   | 0.0                | 0.001        | $\pm 15/2$ | 0.0                | 0.004        | $\pm 15/2$ | 0.0                | 0.076        | $\pm 15/2$ |
|     |                    | 0.062        |            |                    | 0.009        |            |                    | 1.575        |            |
|     |                    | 19.720       |            |                    | 19.811       |            |                    | 16.908       |            |
| 2   | 97.9               | 0.612        | $\pm 13/2$ | 214.4              | 0.908        | $\pm 13/2$ | 13.7               | 0.059        | $\pm 7/2$  |
|     |                    | 0.819        |            |                    | 1.831        |            |                    | 1.591        |            |
|     |                    | 16.670       |            |                    | 15.263       |            |                    | 16.192       |            |
| 3   | 165.2              | 2.726        | $\pm 13/2$ | 263.0              | 2.383        | $\pm 3/2$  | 132.1              | 1.183        | $\pm 13/2$ |
|     |                    | 3.555        |            |                    | 6.136        |            |                    | 1.301        |            |
|     |                    | 13.071       |            |                    | 11.439       |            |                    | 16.449       |            |
| 4   | 224.3              | 0.547        | $\pm 1/2$  | 291.9              | 2.059        | $\pm 7/2$  | 160.2              | 1.771        | $\pm 11/2$ |
|     |                    | 5.250        |            |                    | 5.740        |            |                    | 3.547        |            |
|     |                    | 10.637       |            |                    | 9.696        |            |                    | 13.199       |            |
| 5   | 264.9              | 3.527        | $\pm 3/2$  | 340.2              | 8.963        | $\pm 11/2$ | 213.7              | 1.903        | $\pm 9/2$  |
|     |                    | 5.049        |            |                    | 7.218        |            |                    | 6.308        |            |
|     |                    | 12.739       |            |                    | 3.608        |            |                    | 11.125       |            |
| 6   | 351.8              | 0.254        | $\pm 5/2$  | 392.9              | 0.759        | $\pm 7/2$  | 270.0              | 0.971        | $\pm 1/2$  |
|     |                    | 2.128        |            |                    | 2.505        |            |                    | 3.724        |            |
|     |                    | 13.070       |            |                    | 13.184       |            |                    | 9.574        |            |
| 7   | 405.2              | 0.335        | $\pm 11/2$ | 424.9              | 1.061        | $\pm 1/2$  | 312.9              | 0.657        | $\pm 3/2$  |
|     |                    | 1.363        |            |                    | 2.209        |            |                    | 1.668        |            |
|     |                    | 16.460       |            |                    | 15.221       |            |                    | 12.722       |            |
| 8   | 570.2              | 0.053        | $\pm 7/2$  | 473.7              | 0.421        | $\pm 7/2$  | 518.8              | 0.017        | $\pm 5/2$  |
|     |                    | 0.105        |            |                    | 0.634        |            |                    | 0.039        |            |
|     |                    | 19.468       |            |                    | 18.668       |            |                    | 19.333       |            |

**Table S18.** Calculated spin-free energies ( $\text{cm}^{-1}$ ) of the lowest ten terms ( $S = 3/2$ ) of **2\_Co1** and **2\_Co2** using CASSCF/RASSI-SO with MOLCAS 8.4.

| KDs | <b>2_Co1</b> ( $E/\text{cm}^{-1}$ ) | <b>2_Co2</b> ( $E/\text{cm}^{-1}$ ) |
|-----|-------------------------------------|-------------------------------------|
| 1   | 0.0                                 | 0.0                                 |
| 2   | 373.6                               | 402.5                               |
| 3   | 1112.4                              | 1115.6                              |
| 4   | 6355.8                              | 6276.4                              |
| 5   | 6994.9                              | 7002.3                              |
| 6   | 7696.3                              | 7667.8                              |
| 7   | 14679.5                             | 14600.2                             |
| 8   | 22779.6                             | 22753.7                             |
| 9   | 24133.7                             | 24064.6                             |
| 10  | 25464.5                             | 25491.8                             |

**Table S19.** Calculated weights of the five most important spin-free states for the lowest two spin-orbit states of **2\_Co1** and **2\_Co2** using CASSCF/RASSI-SO with MOLCAS 8.4.

|              | Spin-orbit states | Energy ( $\text{cm}^{-1}$ ) | Spin-free states, Spin, Weights |              |              |              |              |
|--------------|-------------------|-----------------------------|---------------------------------|--------------|--------------|--------------|--------------|
| <b>2_Co1</b> | 1                 | 0.0                         | 1,1.5,0.6487                    | 2,1.5,0.2941 | 3,1.5,0.0538 | 4,1.5,0.0011 | 5,1.5,0.0006 |
|              | 2                 | 210.1                       | 1,1.5,0.8574                    | 2,1.5,0.0988 | 3,1.5,0.0358 | 4,1.5,0.0033 | 5,1.5,0.0019 |
| <b>2_Co2</b> | 1                 | 0.0                         | 1,1.5,0.6610                    | 2,1.5,0.2814 | 3,1.5,0.0542 | 4,1.5,0.0012 | 5,1.5,0.0006 |
|              | 2                 | 204.8                       | 1,1.5,0.8664                    | 2,1.5,0.0895 | 3,1.5,0.0361 | 4,1.5,0.0032 | 5,1.5,0.0020 |

**Table S20.** Calculated energy levels ( $\text{cm}^{-1}$ ),  $g$  ( $g_x, g_y, g_z$ ) tensors of the ground and first excited spin-orbit states of **2\_Co1** and **2\_Co2** using CASSCF/ RASSI-SO with MOLCAS 8.4.

|   | <b>2_Co1</b>       |                                         | <b>2_Co2</b>       |                                         |
|---|--------------------|-----------------------------------------|--------------------|-----------------------------------------|
|   | $E/\text{cm}^{-1}$ | $g$                                     | $E/\text{cm}^{-1}$ | $g$                                     |
| 1 | 0.0                | $g_x = 1.740, g_y = 2.114, g_z = 8.138$ | 0.0                | $g_x = 1.743, g_y = 2.170, g_z = 8.091$ |
| 2 | 210.1              | $g_x = 2.201, g_y = 2.939, g_z = 4.761$ | 204.8              | $g_x = 2.228, g_y = 2.854, g_z = 4.871$ |

**Table S21.** Exchange energies  $E$  ( $\text{cm}^{-1}$ ), the energy difference between each exchange doublets  $\Delta_t$  ( $\text{cm}^{-1}$ ) and the main values of the  $g_z$  for the lowest two exchange doublets of **1** and **2**. Energy is measured relative to the ground crystal field ( $m_j$ ) state.

| Exchange doublets in <b>1</b> | $E$        | $\Delta_t$             | $g_z$  |
|-------------------------------|------------|------------------------|--------|
| 1                             | 0.00000000 | $0.396 \times 10^{-5}$ | 14.594 |
|                               | 0.00000396 |                        |        |
| 2                             | 1.44777134 | $0.420 \times 10^{-5}$ | 36.725 |
|                               | 1.44777554 |                        |        |
| Exchange doublets in <b>2</b> | $E$        | $\Delta_t$             | $g_z$  |
| 1                             | 0.00000000 | $0.183 \times 10^{-2}$ | 32.207 |
|                               | 0.00000000 |                        |        |
| 2                             | 2.00486577 | $0.196 \times 10^{-1}$ | 15.288 |
|                               | 2.00486577 |                        |        |
| 3                             | 2.05528242 | $0.485 \times 10^{-1}$ | 17.687 |
|                               | 2.05528242 |                        |        |
| 4                             | 3.85506596 | $0.315 \times 10^{-2}$ | 6.965  |
|                               | 3.85506596 |                        |        |

### References:

- S1 Aquilante, F.; Autschbach, J.; Carlson, R. K.; Chibotaru, L. F.; Delcey, M. G.; De Vico, L.; Galván, I. F.; Ferré, N.; Frutos, L. M.; Gagliardi, L.; Garavelli, M.; Giussani, A.; Hoyer, C. E.; Li Manni, G.; Lischka, H.; Ma, D.; Malmqvist, P. Å.; Müller, T.; Nenov, A.; Olivucci, M.; Pedersen, T. B.; Peng, D.; Plasser, F.; Pritchard, B.; Reiher, M.; Rivalta, I.; Schapiro, I.; Segarra-Martí, J.; Stenrup, M.; Truhlar, D. G.; Ungur, L.; Valentini, A.; Vancoillie, S.; Veryazov, V.; Vysotskiy, V. P.; Weingart, O.; Zapata, F.; Lindh, R. *J. Comput. Chem.* **2016**, *37*, 506–541.
- S2 Chibotaru, L. F.; Ungur, L.; Soncini, A. *Angew. Chem., Int. Ed.* **2008**, *47*, 4126–4129.
- S3 Ungur, L.; Van den Heuvel, W.; Chibotaru, L. F. *New J. Chem.* **2009**, *33*, 1224–1230.
- S4 Chibotaru, L. F.; Ungur, L.; Aronica, C.; Elmoll, H.; Pilet, G.; Luneau, D. *J. Am. Chem. Soc.* **2008**, *130*, 12445–12455.
- S5 Lines, M. E. *J. Chem. Phys.* **1971**, *55*, 2977–2984.
- S6 Mondal, K. C.; Sundt, A.; Lan, Y. H.; Kostakis, G. E.; Waldmann, O.; Ungur, L.; Chibotaru, L. F.; Anson, C. E.; Powell, A. K. *Angew. Chem., Int. Ed.* **2012**, *51*, 7550–7554.
- S7 Langley, S. K.; Wielechowski, D. P.; Vieru, V.; Chilton, N. F.; Moubaraki, B.; Abrahams, B. F.; Chibotaru, L. F.; Murray, K. S. *Angew. Chem., Int. Ed.* **2013**, *52*, 12014–12019.
